# Supplementary material for: Water flow and preferential flow: A State-of-the-Art throughout the literature
Source: Copernicus journal article supplement (doi:10.5194/hess-2017-210), 2017-04-12
Supplement: Supplementary file [file hess-2017-210-RC1-supplement.pdf]

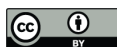

1 **“Water flow” and “preferential flow”**: A State-of-the-Art throughout the literature  
2 **review**  

3 Yinghu Zhang<sup>1</sup>, Xiaoxia Zhang<sup>2</sup>, Zhenming Zhang<sup>1</sup>, Jianzhi Niu<sup>3</sup>, Mingxiang Zhang<sup>1\*</sup>

4 <sup>1</sup> School of Nature Conservation, Beijing Forestry University, 100083, Beijing, PR China

5 <sup>2</sup> Institute of Botany, Chinese Academy of Sciences, 100093, Beijing, PR China

6 <sup>3</sup> School of Soil and Water Conservation, Beijing Forestry University, 100083, Beijing, PR China

7

8 \*Correspondence to:

9 M. Zhang, School of Nature Conservation, Beijing Forestry University, Qinghua East Road 35, 100083, Beijing, PR China. E-mail:

10 pku2015hold@163.com.

11

12 **Abstract**

13 Studies dealing with **water flow** and preferential flow are of typically importance because there are still many  
14 unresolved water security and scarcity problems. It may indeed be a valuable idea to provide a special review of the  
15 progress in the water flow and preferential flow for **the applied water science community** and to identify what is still  
16 missing or unresolved to improve predictions of surface water and groundwater quality within multiscale. This paper  
17 aims to review the state of the art on water flow and preferential flow published per year from 1995 to 2015,  
18 **respectively**, and to present a discussion of perspectives and some significant advances in the main themes of water  
19 flow and preferential flow that have emerged in recent years, with insights, some promising areas for future work, and  
20 suggestions also being provided regarding potential research trends, requirements and solutions. Recorded reports  
21 show that it is of general interest in water flow in the period **1995-2015** and also there are clear significant trends from  
22 physical hydrology and socio-hydrology perspectives. The future trend of water flow which is predicted in some way

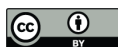

23 indicates a general increase. The term of preferential flow, its significance and progress in the period 1995-2015,  
24 shows that despite the increasing number of papers published on preferential flow, there has not been as much attention  
25 paid to this topic as we have expected, given its vital role in soil hydrology, water sustainability, slope stability and  
26 agricultural management. Finally, existing **love-hate relationship** between water flow and preferential flow pathways is  
27 reviewed.

28

29 **Keywords**

30 Water flow; **Virtual water flow; Blue water flow; Green water flow; Water footprint;** Preferential flow

31



## 32 1. Introduction

33 Most concerning environmental, economic and social issues threaten livelihoods of people worldwide, agricultural  
34 production, industrial chain, energy projects, other forms of anthropogenic water consumption and ecological use since  
35 water natural resources are getting scarce and polluted with increasing population and temperature, higher food  
36 demand and changing precipitation patterns. These issues also exert significant influences on sustaining the survival of  
37 ecosystems (Van Oel and Hoekstra, 2012; Schewe et al., 2014; Elliott et al., 2014; Cazcarro et al., 2014; Lee and Bae,  
38 2015; Dalin et al., 2015; Johansson et al., 2016; Michalak, 2016; McColl et al., 2017). Water is one of the most  
39 complex components on the planet operating at the interface of the hydrosphere, atmosphere, pedosphere and  
40 biosphere. Long-term water use sustainability, in some way, tends to be the most significant consideration at global  
41 scales. Agriculture is the largest consumptive sector of water use in global water systems (Schewe et al., 2014;  
42 Haddeland et al., 2014). In addition to agricultural sectors, water is also used for domestic and industrial sectors. Large  
43 scale transfer of water from water rich regions to water poor regions has been conducted to meet water demands (Troy  
44 et al., 2015). However, increased aridity, reduced soil water content, changes in climate variability and frequency of  
45 extreme weather events pose highly direct threat to water resources sustainability, water security and agricultural food  
46 security even severe land degradation and desertification (Maestre et al., 2015; Phalkey et al., 2015). An unprecedented  
47 global water crisis in human history has been predicted (Elshafei et al., 2014) which is dramatically related to land  
48 degradation processes that are millennia old (Cerdà and Lavee, 1999; Jafari and Bakhshandehmehr, 2016).

49 It is typically evident that the function, cycle, intrinsic property and in particular the flow of water are critical to  
50 sustain health and stability of natural and man-made ecosystems. We have considerable knowledge of water, its  
51 formation and distribution, but our understanding upon water flow and preferential flow is incomplete and rather  
52 faraway. In the previous, as well as in the recent, more studies relating to water flow including oil-water flow (Gao et  
53 al., 2015; Boostani et al., 2017), air-water flow (Felder and Chanson, 2016; Felder and Pfister, 2017), canopy water

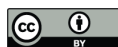

54 flow in plant (Fricke, 2015), water flow in rock fracture or glacier (Fountain et al., 2005; Neuman, 2005), debris-water  
55 flow (Malet et al., 2005), flooding-water flow (Gaines, 2016), river-water flow (Derx et al., 2013), subsurface  
56 storm-water flow (van Schaik et al., 2008; Nieber and Sidle, 2010), water flow in soils (preferential flow and soil  
57 matrix flow) and water flow within watersheds (surface water flow and groundwater flow) have got a broader interest  
58 in some way (Keesstra, 2007; Zema et al., 2016).

59 The studies of water flow above are implied from physical hydrological perspectives and are relating to water  
60 security and sustainability. However, with regard to socio-hydrological perspectives, the human-society-water nexus  
61 could change water resources management and could be better understood when virtual water flow is introduced.  
62 Global virtual water flow is estimated based on trade in agricultural and industrial sectors. The sum of global virtual  
63 water flow related to trade in agricultural and industrial products in the period from 1996 to 2005 was  $2320 \text{ Gm}^3 \text{ y}^{-1}$  on  
64 average. The largest share (76%) of the virtual water flow between countries is related to global trade in crops and  
65 derived crop products. Virtual water flow trade in animal products and industrial products contributed 12% each to the  
66 global virtual water flow. The volume of global virtual water flow related to domestically produced products was  $1762$   
67  $\text{Gm}^3 \text{ y}^{-1}$  (Hoekstra and Mekonnen, 2012). The total volume of global virtual water flow includes virtual water flow that  
68 is related to re-export of imported products. In light of the concept of virtual water flow, water footprint including  
69 consumptive and degradative water footprint was highlighted to emphasize on the link between human and water to  
70 produce the products (Hoekstra, 2013) and was used to characterize the volume of freshwater resources consumption  
71 and pollution in relation to production or consumption (Hoekstra, 2003). The blue, green and grey water flow, are three  
72 components of the water footprint (Hoekstra and Mekonnen, 2011). Blue and green water flow are two aspects of the  
73 consumptive water footprint, while grey water flow which represents the volume of water assimilating pollutants is not  
74 significantly neglected as people consider the degradative water footprint. The water in runoff, lakes, reservoirs,  
75 wetlands and man-made structures can be directly used by human consumption, in general, and could be regarded

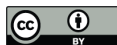

76 them as blue water (surface water and groundwater). Blue water is equal to the difference between evapotranspiration  
77 and precipitation when evapotranspiration is higher than the effective precipitation, while blue water is zero when  
78 evapotranspiration is lower than precipitation. Water evaporation during and after irrigation process is not the  
79 component of blue water. Because this part is back the natural system afterwards. Furthermore, the water stored in  
80 unsaturated soil layers is defined as green water (precipitation), either reclaimed by the atmosphere through soil  
81 evaporation or consumed by the plant roots and lost through transpiration during photosynthesis (Vanham, 2016).  
82 Green water is the major part of water use for agricultural sector. In general, green water is equal to the effective  
83 precipitation when evapotranspiration is higher than the precipitation during crop growth, while green water is equal to  
84 evapotranspiration when evapotranspiration is lower than effective precipitation. While the grey water refers to the  
85 volume of freshwater which can assimilate the concentration of given pollutants into natural back ground  
86 concentration to satisfy the ambient water quality standards. It is not a real water volume used along production  
87 processes, but the volume used to restore water quality (Lovarelli et al., 2016). Therefore, the three component of  
88 virtual water flow is highly interactive and important for the water balance and stability. For example, the increase of  
89 green water flow to the atmosphere due to the high agricultural management or forested practices leads to the decrease  
90 of regional surface water flow. This in turn affects the availability of long-term blue water flow and the change of  
91 groundwater table.

92 In addition to the significance of water flow above, preferential flow is a common and widespread phenomenon of  
93 water flow in soils with macropores (Beven and Germann, 2013; Zhang et al., 2016a). Just now we referred that  
94 agriculture was the largest consumptive sector of water use. However, large numbers of pesticides were put into  
95 agricultural catchments with the development of urbanization, industrial and agricultural developments (Kim et al.,  
96 2017). Those pesticides could be carried by water flow through the soil profiles to the groundwater table quickly. So a  
97 wider range of studies in some way should often provide more data to interpret why agricultural pesticides and other



98 contaminants that should sorb strongly onto soil particles were being detected in groundwater tables and drains. Even  
99 if these contaminants sorb onto fine colloidal materials, it was still confused to explain how water flow pathways could  
100 carry those fine materials to depths without being filtered out by the surrounding soil matrix. The occurrence of  
101 preferential flow might be the significant driver for the phenomenon. As an unpredicted water flow in vadose zone,  
102 preferential flow is continuing to get more attentions despite lots of unresolved questions due to the complexity of  
103 vadose zone. Because it is clear that the vadose zone in which water, gas and solute transfer between the soil surface  
104 and water table is involved in many aspects of soil hydrology, such as soil water storage, soil erosion, water infiltration,  
105 evaporation, groundwater recharge and so forth (Nielsen et al., 1986).

106 In this review, it is immediately clear that water flow are preferential flow are such broad subjects so that this short  
107 review is necessarily selective rather than comprehensive. We focus on the study and resulting scientific literature of  
108 water flow in soils and within watersheds from physical hydrological and socio-hydrological perspectives and  
109 preferential flow. It aims at evaluating to what improvements in recent water flow and preferential flow have made,  
110 whether the love-hate relationship between water flow and preferential flow pathways have been evaluated. It is the  
111 objective of this paper to review the progress of water flow and preferential flow with the aim of delineating global  
112 water resources security which may be elucidated by organic matters, pesticides, contaminants and heavy metal to the  
113 groundwater table without resistance.

114

## 115 2. Methods

116 A comprehensive literature search was conducted to conclude the significance and progress of “water flow” and  
117 “preferential flow”, respectively. Based on the extensiveness of the existing literatures and the availability of most  
118 studies, we focused on and started with the set of published papers with the topic of “water flow” and “preferential  
119 flow” from 1995 to 2015 using the database of Web of Science (WoS). No restrictions on research types were applied.



120 In light of the literature survey, the term “water flow” and “preferential flow” in their titles, abstracts or keywords were  
121 used as search concepts. We then refined the scope of water flow studies in physical hydrology and socio-hydrology,  
122 respectively. For water flow in physical hydrology we considered surface water flow, groundwater flow and water  
123 vapor flow into the atmosphere, while for virtual water flow, green water flow, blue water flow and grey water flow  
124 were implied for water flow in socio-hydrology. An analysis of published papers with the topic of water flow on the  
125 temporal and geographical dimension was performed. A map was made for the total number of published papers of  
126 water flow (Fig. 1). In preferential flow studies, we statistically analyzed all papers by drivers, degrees, properties,  
127 scales, models, methods, mechanisms and types of preferential flow. Methods applied for considering the two topics  
128 include descriptive analyses. A descriptive approach is to compare the existing trends of the two and make clear sense  
129 of their interactions in a single analysis framework. Additionally, the number of publications per year and the number  
130 of references per country by author affiliations and area in which the research was conducted were summarized.  
131 Finally, a database with the topic of water flow and preferential flow pathways—a love-hate relationship was produced  
132 from the published literature. Relationship between water flow and preferential flow pathways was investigated  
133 through a diagram (Fig. 7).

134

### 135 3. Results and discussion

#### 136 3.1 State of the art on water flow

##### 137 3.1.1 Water flow on a world extent

138 The special section themed with water flow has got broader interests in the period 1995-2015. In recent years, there  
139 has been a growing body of research relating to water flow. It is easy to rapidly discern the similarities (studies on  
140 drivers of water flow) and differences (studies in physical hydrology and socio-hydrology) in these literatures. For  
141 example, the similarities of water flow studies were concentrated on their drivers, such as human activities (Jiang et al.,



142 2015), changes in climate variability (Haddeland et al., 2014; Gan et al., 2015; Jiang et al., 2015; Lee and Bae, 2015;  
143 Najafi and Moradkhani, 2015; von Blanckenburg et al., 2015; Wang et al., 2015; Zhou et al., 2015a); land use changes  
144 (Algeet-Abarquero et al., 2015; Nourani et al., 2015; Yuan et al., 2015; Zhou et al., 2015b; Rodriguez-Lloveras et al.,  
145 2016a, b; Zhao et al., 2017); afforestation or vegetation reconstruction (Zhang et al., 2015a; Hayashi et al., 2015;  
146 Buendia et al., 2016); precipitation (Lutz et al., 2014; Emmanuel et al., 2015; Sadeghi et al., 2016); soil water content  
147 (Lal et al., 2015); biological soil crusts or microbiotic crusts thickness (Chamizo et al., 2015; Kidron, 2015); hillslope  
148 (Liu et al., 2000; Michaelides et al., 2002; Fujimoto et al., 2008); atmospheric carbon dioxide (CO<sub>2</sub>) (Field et al., 1995;  
149 Gedney et al., 2006); solar dimming (Stanhill and Cohen, 2001); management regimes (van Oudenhoven et al., 2015);  
150 soil burn (Vieira et al., 2015) and so forth.

151 Based on the recorded reports of studies, a global network termed with water flow is summarized. A total of  
152 180751 publications which met the selection criteria were obtained online from WoS. The distribution of document  
153 types and disciplines was also analyzed. Articles (175104) were the dominant document type, comprising 97% of the  
154 total publications. Meanwhile, the studies were mainly concentrated on the inter-disciplines, such as water resources  
155 (29969), environmental sciences (26849), geosciences (19725) and engineering chemical (14839). Papers were  
156 published in 100 languages. English was the dominant language for papers published on water flow and represented 98%  
157 of all published papers. From 1995 to 2015, the number of published papers increased from 4077 in 1995 to 15395 in  
158 2015. The annual number of published papers increased remarkably. With respect to water flow in journal publication  
159 patterns, Journal of Hydrology ranked first in the number of published papers (3170, 2%), and followed by Water  
160 Resources Research (2628), Hydrological Processes (1913), Water Science and Technology (1642). The survey data in  
161 Fig. 1 demonstrated: from 1995 to 2015, the largest number of published papers with the topic of water flow was  
162 typically distributed in USA, followed by China, Canada, England and Japan. However, the number of this project was  
163 significantly lower than the number of papers published by USA and so forth, and was represented with blue darks in





164 Fig. 1. In addition, from 1995 to 2015, the annual growth rate of published papers of water flow was typically higher  
165 than growth rate in planning. The above results concluded that studies on water flow significantly increased year by  
166 year.

167 It is immediately clear where current hot spots might be achieving mathematical models that integrate surface  
168 water flow and groundwater flow, assessing regional or national or global water footprint (green water flow, blue water  
169 flow and grey water flow) in the studies of water flow. As a result of the literature research and selection, studies on  
170 water footprint take on a growing trend. The online database WoS search for literatures using the term “blue water flow”  
171 resulted in a total of 2058 publications in the period 1995-2015, and 3016, 700 publications for the term “green water  
172 flow” and “grey water flow”, respectively. For studies of blue water flow, articles (1882) were the dominant document  
173 type, comprising 91% of the total publications. In general, water resources (357), environmental sciences (353) and  
174 chemistry analytical (323) are the main research fields. The number of published papers increased from 40 in 1995 to  
175 190 in 2015. With respect to green water flow, articles (2548) were the dominant document type, comprising 85% of  
176 the total publications. The studies were mainly concentrated on the environmental sciences (518), water resources (470)  
177 and chemistry analytical (256). From 1995 to 2015, the number of published papers increased from 45 in 1995 to 324  
178 in 2015. In addition, for grey water flow, articles (601) were the dominant document type, comprising 86% of the total  
179 publications. The number of published papers increased from 18 in 1995 to 55 in 2015. In light of the recorded reports,  
180 a variety of topics are relating to water science and environmental science. Blue water flow, in some way, is the most  
181 water use component and is typically important for household or drinking water uses, industrial water uses and  
182 agricultural water uses (Fig. 2). Advanced studies concluded that countries with higher amount of green water flow  
183 tend to have intense agricultural sectors and more water bodies (Veettil and Mishra, 2016).

184

185 **3.1.2 Water flow in physical hydrology**



186 Traditional hydrological science focuses on the study of physical water flow and water stock based on hydrological  
187 models. In particular, hydrological models rely on physical principles of mass and momentum balance to characterize  
188 water flow and stock. With regard to physical hydrology, precipitation refers to a key input of freshwater resources to  
189 the surface, while evapotranspiration refers to a key pathway for freshwater to return to the atmosphere. Surface water  
190 flow and groundwater flow are two key components of water flow in physical hydrology. In general, surface water  
191 flow is generated due to precipitation excess and not due to soil saturation (Hueso-González et al., 2015). Surface  
192 water flow on the land surface or watershed is a key unit of analysis in physical hydrology due to the significance of  
193 landscape topography in characterizing surface water flow. Surface water which provides wide ecosystem services is  
194 only a part of water resources in the world, but it is more accessible to people (Pekel et al., 2016). Permanent surface  
195 water in North America accounts for almost 52% of the total surface water resources for less than 5% of the Planet's  
196 population, however, permanent surface water only accounts for 9% in Asia where 60% of the Planet's population  
197 occurs (Pekel et al., 2016). Seasonal surface water flow changes with high heterogeneity, fluctuates in wet/dry  
198 conditions and even shifts geographically (Pekel et al., 2016). So predicting and modelling surface water flow are  
199 challenging because of strong variability of surface water flow occurrence. Chen and Wang (2015) concluded that  
200 modelling seasonal surface water flow is not accurate because of the heterogeneity of soil properties including soil  
201 infiltration, soil storage capacity, land use cover and topography. Tesemma et al. (2015) stated that making accurate  
202 predictions for surface water flow was challenging due to the changing conditions like climate changes and human  
203 activities and also showed that some models were found to function poorly, especially the factors of climate.  
204 Groundwater flow which belongs to subsurface aquifers is a key component of water flow that supports riparian  
205 ecosystems during drought conditions (Rassam et al., 2013). It is typically evident that groundwater flow from shallow  
206 aquifers to catchment surface water is the major part of the total water flow volume in most rivers (Wittenberg, 2003).  
207 Groundwater is also benefit for ecosystem services, energy and food security, human health and water security and



208 scarcity. Groundwater flow is a critical component of the hydrological cycle (Gleeson et al., 2016). Groundwater  
209 recharge which is more heterogeneous than water table gradients is difficult to measure directly at local or regional  
210 scales (Gleeson et al., 2016). Taylor et al. (2013) showed that understanding groundwater flow could be benefit for  
211 global energy, water and food security under climate change, in particular the increase of frequent and intense droughts  
212 and floods events. de Graaf et al. (2015) presented a high-resolution global-scale groundwater model to construct  
213 groundwater flow variations. Sakakibara et al. (2017) stated that both local and regional groundwater flow space-time  
214 variations are crucial for water resources management, in particular for low precipitation regions. In previous studies,  
215 water flow models have focused on surface water flow or groundwater flow individually. In recent advances, water  
216 flow models that integrate surface water and groundwater, such as MODHMS (Panday and Huyakorn, 2004),  
217 PARFLOW (Kollet and Maxwell, 2006), GSFLOW (Markstrom et al., 2008), HydroGeoSphere (Therrien et al., 2010;  
218 Brunner and Simmons, 2012), MIKE-SHE (Graham and Butts, 2005) and SWATMOD (Sophocleous et al., 1999),  
219 have been developed in recent years. Kollet and Maxwell (2006), Engelhardt et al. (2014), De Schepper et al. (2015),  
220 by a coupled integrated surface and subsurface flow modelling approach, accounted for the water flow processes in  
221 complex systems at field scales.

222 Surface water, such as reservoirs, rivers, lakes and wetlands, may interact with groundwater directly. The  
223 interaction between surface water flow and groundwater flow is a critical component of hydrological processes within  
224 multiscale. Surface water flow and groundwater flow interaction tends to proceed in two ways: surface water infiltrates  
225 into the groundwater table, and groundwater flows into the surface water (Kalbus et al., 2006). However, the  
226 interaction between surface water flow and groundwater flow is often more complex because this interaction affects  
227 both water security and scarcity (Pahar and Dhar, 2014). The contamination or development of one is bound to have  
228 effects on another (Sophocleous, 2002). Sakakibara et al. (2017) concluded that both surface water flow and  
229 precipitation affected groundwater flow in the rainy season, whereas in the low precipitation periods, both reservoir



230 and stream water flow affected that most. Understanding the interaction is important for determining contaminants  
231 transport pathways as well as for water resources management. Alley et al. (2002) reviewed the interaction between  
232 surface water flow and groundwater flow was mostly focused on streams from environmental flow (i.e., chemical  
233 composition in water bodies) perspectives, whereas few studies on lakes, wetlands and oceans. Scibek et al. (2007)  
234 explored the effects of climate change on the interaction between surface water flow and groundwater flow using a  
235 high-resolution transient groundwater model. Li et al. (2014) stated that metals from geogenic and atmospheric factors,  
236 agricultural and industrial activities could disperse to surface water bodies through surface water flow or penetrate to  
237 groundwater table through preferential flow pathways with the influences of surface-groundwater interaction. The  
238 interaction between surface water flow and groundwater flow also affected the mass and energy exchange between the  
239 two water systems. The magnitude and direction of exchange between surface water (e.g., rivers) and groundwater is  
240 mainly determined by the hydraulic gradient between rivers and aquifers (Rassam, 2011). The exchange between rivers  
241 and groundwater not only influence water flow velocities in rivers but also exert effects on water security and riparian  
242 zone characteristics (Sophocleous, 2010). In riparian zones, the interaction between surface water flow and  
243 groundwater flow is the major part for the exchange of mass and energy. However, previous studies of surface water  
244 flow were often managed without sufficient consideration to the impact on groundwater flow and without available  
245 integration with groundwater flow (Nielsen et al., 1986). In recent studies, the interaction, exchange and integrated  
246 conceptual models for surface water flow and groundwater flow are generally interesting year by year.

247 Despite the significant importance of surface water flow and groundwater flow in water updating, the water vapor  
248 flow into the atmosphere is also a neglecting component. Water vapor flow is sometimes called green water flow.  
249 Rockström et al. (1999) estimated the water vapor flow of major terrestrial biomes and the total water vapor flow from  
250 continents. Gordon et al. (2005) stated that both deforestation and agricultural irrigation were the main driving forces  
251 for the alteration of global water vapor flow, and they also raised questions related to the influences of land use and



252 climate change on altering water vapor flow at global scales. Bittelli et al. (2008), by a fully coupled numerical model,  
253 concluded that water vapor flow affected soil mass and energy budget highly and that water vapor flow induced the  
254 small fluctuations of soil water content near the surface. However, this component could bring about unpredictable  
255 problems with the change of natural conditions and human activities. According to the atmosphere interface, water  
256 holding capacity increases with temperature. The average temperature is rising from global scales. Global warming is  
257 possible to increase the intensity of precipitation events. The increase of precipitation intensity affects the frequency of  
258 flooding (Dankers et al., 2014). The water holding capacity of the atmosphere has been increasing due to the frequent  
259 global warming events caused by the combined effects of climate variability and human intervention. Such will result  
260 in the frequency of precipitation extremes, the increase of dry periods and the intensification of floods and droughts  
261 (Prudhomme et al., 2014; Schewe et al., 2014).

262

### 263 **3.1.3 Water flow in socio-hydrology**

264 Advances in the understanding of water flow in physical hydrology on the land surface or in the subsurface  
265 aquifers offer interests and promises in recent years. However, water flow assessment in physical hydrology often does  
266 not consider human-induced effects on hydrological processes. In particular, estimates of water flow at local or global  
267 scales may not be accurate until human actions are considered. In recent years, human impacts on the hydrological  
268 processes are only considered in regional hydrological distortion metrics (Weiskel et al., 2014). However, human  
269 impacts in those studies tend to be regarded as external driving force or as a parameter simply incorporated into  
270 hydrological models instead of being an internal driver along water flow assessment (Troy et al., 2015; Levy et al.,  
271 2016).

272 Socio-hydrology, the science of people and water aiming at understanding the dynamics and co-evolution of  
273 coupled human water systems (Troy et al., 2015), is an inter-disciplinary field studying the dynamic interactions and



274 feedbacks between water and people. Areas of research in socio-hydrology include the historical study of the interplay  
275 between hydrological and social processes, comparative analysis of the evolution and self-organization of human and  
276 water systems in different cultures and process-based modelling of coupled human water systems. Di Baldassarre et al.  
277 (2013) developed a simple, dynamic model to conceptualize the interactions and feedbacks between social and  
278 hydrological processes to avoid flooding-water flow based on socio-hydrology framework. Elshafei et al. (2014)  
279 worked towards a conceptual framework for socio-hydrology model to better understand human feedbacks on  
280 hydrological processes (i.e., water flow) and to make water resources sustainability at global scales. Gober and  
281 Wheeler (2014) concluded that it was impossible to predict long-term water system dynamics without considering  
282 socio-hydrology. Viglione et al. (2014), by socio-hydrology modelling approach, perceived the risk of flooding-water  
283 flow due to its high damage to community development, however, they also stated that the dynamic conceptual model  
284 overestimated flood risk which led to low economic opportunities and prosperities. Di Baldassarre et al. (2015)  
285 proposed a modeling framework to give feedbacks between social and hydrological processes involving the perception  
286 of flooding-water flow risk in urban areas. Blair and Buytaert (2016) stated the art review on more in-depth  
287 socio-hydrology modelling. Those studies are in attempt to apply socio-hydrology modelling framework to perceive  
288 human-water systems interactions and feedbacks. Socio-hydrology is related to integrated water resources  
289 management. In particular, integrated water resources management aims at controlling the water system to get desired  
290 outcomes for the environment and society. The scenario based approach is often used to explore the interaction  
291 between humans and water during integrated water resources management. However, this approach may be unrealistic,  
292 especially for long term predictions, as it does not account for the dynamics of the interactions between water and  
293 people. The focus of integrated water resources management is on controlling or managing the water systems to reach  
294 desired outcomes for society and the environment, while the focus of socio-hydrology is on observing, understanding  
295 and predicting future trajectories of coevolution of coupled human water systems. It is promisingly noted that we better



296 understand the interaction between human activities and water systems within the watershed unit to sustainably control  
297 water resources management. However, models incorporating socioeconomic systems or human-hydrology  
298 interactions remain open questions. Socio-hydrology has three goals: 1) characterize multiscale, spatial and temporal  
299 changes and features of socio-hydrological processes; 2) interpret socio-hydrological processes to human-induced  
300 effects and predict the future scenarios of their interplay; and 3) understand the significance of water systems on  
301 people (Sivapalan et al., 2014). According to socio-hydrology framework, three pathways that human-induced effects  
302 on water flow are considerable: 1) internal modifications; 2) infrastructure-based external transfer; and 3) virtual water  
303 flow transfer. Human activities, such as land cover change and urbanization, typically affect surface water flow and  
304 other hydrological processes within the watershed unit. Those human activities refer to internal modifications.  
305 Moreover, human activities change the physical boundary of watershed to prompt it more linked in some way to the  
306 socioeconomic driving forces. During hydraulic engineering process, human infrastructure could alter water flow to  
307 ensure water security and scarcity. Infrastructure includes both hard-path engineering projects (e.g., dams and weirs)  
308 and soft-path measures (e.g., water allocation rules, demand management practices and other policies). These  
309 human-induced measures within the watershed unit refer to infrastructure transfers. The human-induced virtual water  
310 exchange within the watershed unit is regarded as virtual water flow transfer (Konar et al., 2016). In socio-hydrology, a  
311 wider range of drivers control the interaction between socioeconomic and hydrological processes at large catchment  
312 scales. Drivers tend to be difference in policy, technology, fuel cost, trade barrier and historical factor. Water flow in  
313 natural systems downhill, while it can uphill as social drivers affect. An example of water flow that socio-hydrology  
314 may address is referred to as virtual water flow. In particular, the topic of virtual water flow falls within the science of  
315 socio-hydrology (Sivapalan et al., 2012; Konar et al., 2013). Virtual water flow is defined as the transferring volume of  
316 virtual water from one area to another when goods and services occur (Hoekstra and Mekonnen, 2011). When the  
317 concept of virtual water was introduced (Allan, 1997), many researchers predicted that global commodities would



318 self-organize to alleviate water scarcity. People set out to look for solutions to water resources crisis because of the  
319 significance of virtual water flow in balancing regional and global water security and scarcity (Sivapalan et al., 2014;  
320 Sun et al., 2016). For example, Konar et al. (2013) investigated the impacts of changing climate on global virtual water  
321 flow and concluded more water resources saving under climate change were encouraged by international virtual water  
322 flow trade at global scales. More papers have growing focused on the virtual water flow of grain products and goods  
323 either in global or regional or national perspectives (Table 1).

324 In principle, virtual water flow should be from regions rich in water resources and high water use efficiency to  
325 those that poor in water resources and low water use efficiency. However, many local and regional virtual water flow  
326 trades lead to irrational water resources management. With respect to virtual water flow in China as an example,  
327 studies are of generally high interests. According to the report of Water Resources, China, water resources in southern  
328 China account for more than 80% of total water resources. Grain products in southern China is less than that in  
329 northern China even though the climate of southern China is more favorable to grain growth, which leads southern  
330 China transferring from grain exporter to grain importer. Thus virtual water flow is transferred from water poor regions  
331 to water rich regions (Wang et al., 2014; Sun et al., 2016) (Fig. 3). Though water resources are being transferred from  
332 southern China to northern China in real form by the South-to-North Water Diversion Project, water resources in  
333 virtual form are being transferred from northern China to southern China (Sun et al., 2016). Meanwhile, northern  
334 China exports more water intensive grain products and thus water scarcity is more serious in northern China (Sun et al.,  
335 2016). In fact, northern China annually exports about 52 billion m<sup>3</sup> of virtual water to southern China, which is more  
336 than the maximum proposed real water transfer volume along the three routes of the South-North Water Transfer  
337 Project (Ma et al., 2006). It is immediately clear that researchers state that this transfer project could not meet China's  
338 water needs (Barnett et al., 2015). China is a net importer of virtual water flow in agricultural products. In particular,  
339 soy accounts for more than 93% of global virtual water flow (Dalin et al., 2014). However, China is a net exporter of





340 virtual water flow when considering all sectors including agriculture, industry and services (Mekonnen and Hoekstra,  
341 2012). Therefore, food trade from northern to southern China amounts to a total virtual water flow more than the  
342 proposed diversion of real water through the South-North Water Transfer Project (Ma et al., 2006; Sivapalan et al.,  
343 2014). The proposed diversion might form when complex systems dynamics controlled by policies, multinationals,  
344 supermarkets, retailers and powerful countries (Savenije, 2000). In northern, northeastern and northwestern China,  
345 green water accounts for the main part and the green water proportion is 85%, 67%, and 73%, respectively, but in  
346 eastern, western and southwestern China, green water accounts for 49%, 49%, and 52%, respectively (Fig. 3). In the  
347 main part of southern China, blue water resources are rich but southern China is a net importer from northern China.  
348 As can be seen from Fig. 3A, large number of water use volume is from eastern, northern and southern China, and  
349 agricultural products are the most water use, followed by industrial and domestic water use. From Fig. 3B, surface  
350 water flow and groundwater flow are mainly located into the eastern, southern and southwestern China. In particular,  
351 southern China accounts for the main part of total water resources, which also shows that it is not appropriate to  
352 transfer agricultural food from north to south of China. In light of the report of Water Resources, Beijing, China, the  
353 development area in which the available water per person is only 3% of the world's average has been suffering serious  
354 water scarcity. Researchers have concluded that the 2022 Winter Olympics in Beijing will exacerbate water scarcity of  
355 Beijing due to the huge water use from blue water flow, energy and hydropower to cool water, and the low  
356 precipitation in February, and showed that Olympics will make Beijing water scarcity worse (Yang et al., 2015).

357

#### 358 **3.1.4 Water flow future challenges**

359 Following future challenges:

- 360 • How to assess the effects of water flow in soils on water flow within the watersheds.
- 361 • How to in an attempt to construct a framework of “Big data” to imply long-term changes of water flow.

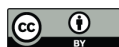

362 • Understanding which way the water flow is and why this is so is the major part of water flow in  
363 socio-hydrology.

364 • How human-water systems are coupled, develop and evolve? And how to incorporate social and hydrological  
365 processes into socio-hydrology models? These issues are in question (Troy et al., 2015).

366 • One important applied research thesis for the future is for studies on how virtual water flow will change and  
367 co-evolve if taxes are placed on the virtual water trade (Sivapalan et al., 2014).

368 • Studies on global virtual water flow have been undertaken between countries. In general, the volume of virtual  
369 water flow is transferred from countries with abundant water resources to countries with higher water scarcity. These  
370 studies aims to provide policy strategies (e.g., a country or region through exporting water intensive agricultural food  
371 from water rich countries or regions to secure their domestic water resources) and water management practices making  
372 for the government to alleviate the domestic water resources stress and guarantee agricultural food security in  
373 importing countries. However, little attention has been paid to the study of virtual water flow in exporting countries (da  
374 Silva et al., 2016).

375 • How to construct a mathematical model that incorporates ecology, hydrology and economy modules to better  
376 assess blue, green and grey water flow within multiscale.

377 • Hydrological connectivity is crucially significant for watersheds where water flow is dominated by rapid surface  
378 water flow. So, how to quantify water flow between different water bodies across different landscapes, or among in  
379 soils, atmosphere and plants, or between the hillslope and the watersheds, or surface water flow and groundwater flow,  
380 and the aquifers accurately, based on the hydrological connectivity, is still in question. In light of the hydrological  
381 connectivity between surface water flow and groundwater flow, the interaction between surface water flow and  
382 groundwater flow tends to recharge to or discharge from the aquifers. In future, human activities should fully  
383 incorporate the concept of hydrological connectivity into water flow modelling to better assess water resources



384 sustainability. In future, understanding the role of hydrological connectivity and integrating the concept of hydrological  
385 connectivity into hydrological models could benefit for the policy makers to know how water flow connects between  
386 or among different water bodies, in particular the occurrence of preferential flow. Hydrological connectivity is the  
387 concept that water flow provides a pathway for the exchange of mass and energy between different environments and  
388 may occur only during wet conditions or during seasonal snowmelt conditions. Assessing the strong variability of  
389 space-time dynamics of hydrological connectivity is better to understand its high influences on water security and  
390 ecosystem services progressively, in particular for understanding of hydro-logic, hydro-geologic and hydro-ecological  
391 processes.

392

### 393 **3.2 State of the art on preferential flow**

#### 394 **3.2.1 Preferential flow on a world extent**

395 The special section themed with preferential flow has also got broader interests in the period 1995-2015. These  
396 researches comprise inter-disciplinary efforts which have advanced our understanding of preferential flow. The special  
397 section preferential flow emphasized the need to link with the studies of groundwater pollution, land degradation, soil  
398 physical and hydrological processes (Zhang et al., 2017). The number of studies increased in the most recent years,  
399 proving the growing interest on the indicator. The online database WoS search for literatures using the term  
400 “preferential flow” resulted in a total of almost 7608 publications in the period 1995-2015. The distribution of  
401 document types and disciplines of preferential flow studies was analyzed. Articles (6717) were the dominant document  
402 type, comprising 88% of the total publications. The studies were mainly concentrated on water resources (1711) and  
403 environmental sciences (1317). With respect to journal publication patterns, Journal of Hydrology ranked first in the  
404 number of published papers (274, 4%) and followed by Water Resources Research (241), Vadose Zone Journal (179)  
405 and Hydrological Processes (141). The survey data in Fig. 4 demonstrated: from 1995 to 2015, the number of



406 published papers increased from 168 in 1995 to 496 in 2015. The annual number of published papers increased  
407 remarkably. The largest number of published papers of preferential flow was typically distributed in USA, followed by  
408 Germany, France and China. In addition, from 1995 to 2015, the annual growth rate of published papers of preferential  
409 flow was also typically higher than growth rate in planning. The above results concluded that studies on preferential  
410 flow were significantly interesting year by year. Fig. 4 provides a summary of the recent and previous studies.

411 The co-authorship networks of countries in the world are social networks constructed by connecting actors in case  
412 they have co-authored together. Collaborative papers published with the topic of preferential flow and academic  
413 communication and collaboration in the study of preferential flow during the last 20 years from 1995 to 2015 are  
414 increasingly broader. The contribution of different countries to papers published was indicated in this review. Based on  
415 the results, 17 countries of the world had published papers of preferential flow with the number > 100. Among these  
416 countries, USA has published 681 papers concentrating on preferential flow from 1995 to 2015, followed by Germany  
417 (368), France (284) and England (273). The name and share of countries are shown in Fig. 5. It is immediately clear  
418 that the collaboration between other countries and USA is more active.

419

### 420 **3.2.2 Preferential flow: Significance and progress**

421 In the 19th and beginning of the 20th century, macropores as continuous openings influencing water flow was  
422 observed which could provide big footprints of preferential flow for soil hydrologists in the near future (Schumacher,  
423 1864; Lawes et al., 1882; Engler, 1919). Preferential flow refers to all phenomena where 70-85% water flow in the  
424 unsaturated zone through localized pathways relatively quickly bypassing the surrounding soil matrix, which makes it  
425 difficult to predict water flow in the field conditions (Kapetas et al., 2014). Preferential flow phenomena do favors of  
426 understanding of ecological and hydrological functions of soil, such as the transformation of substances and energy  
427 entering the soil, sorption of substances and water by soil, formation of chemical composition of groundwater and the



428 regulation of water balance of landscapes (Zhang et al., 2017). Helling and Gish (1991) distinguished root channels,  
429 cracks, fissures as preferential flow pathways because of their promotion in water flow. Li and Ghodrati (1994), by  
430 breakthrough curve methods, concluded the influences of root channels on preferential transport of Nitrates. Hagedorn  
431 and Bundt (2000) stated that preferential flow pathways in forest soils could persist for decades. Jørgensen et al. (2002)  
432 reported that water flow was more obvious in soil profiles with root channels than that without root channels. Franklin  
433 et al. (2007) showed that the mechanisms of preferential flow were ambiguous though a wide range of studies had been  
434 done for preferential flow. Bogner et al. (2010) found that root biomass was larger in preferential flow pathways than  
435 that in the surrounding soil matrix. Etana et al. (2013) implied that persisted compaction of subsoil might enhance the  
436 degree of preferential flow. Xin et al. (2016) found that water flow increased remarkably for soils with distributed  
437 macropores compared with soils without macropores. Zhang et al. (2017) concluded that preferential flow was more  
438 obvious in stony soils and that preferential flow patterns were distributed in soil profiles with high heterogeneity.

439 Stronger preferential flow phenomena occur in the fine texture soils and in the vicinity of trees than is found  
440 elsewhere (Benegas et al., 2014), while weaker preferential flow phenomena occur in larger organic carbon content  
441 soils (Ghafoor et al., 2013). Preferential flow phenomena in some soils are enhanced in wetting soil conditions due to  
442 reduced lateral water flow from the preferential flow pathways to the surrounding soil matrix (Hardie et al., 2013). The  
443 occurrence of preferential flow occurs at different soil types, such as forest soils (Van Der Heijden et al., 2013; Guo et  
444 al., 2014; Laine-Kaulio et al., 2014; Zhang et al., 2015b, c; Zhang et al., 2017); constructed wetland soils (Hua et al.,  
445 2014); and agricultural soils (Koestel et al., 2013; Zhang et al., 2014, 2015d; Jiang et al., 2017). With respect to  
446 agricultural soils in particular, the rising effects of preferential flow on soil water conservation prompt people to  
447 conduct better management practices. Because preferential flow exerts highly influences on seed emergence, crop  
448 growth and even crop yield. Williams et al. (2016) stated the variability of preferential flow dynamics in agriculture  
449 both in tillage and no-tillage management measures and concluded that the interaction between preferential flow



450 pathways and the surrounding soil matrix were found to perform highly along water flow processes. Jiang et al. (2017),  
451 by dye tracing experiments, implied the influences of different management practices on preferential flow occurrence  
452 and concluded that both alfalfa and conservation tillage in agricultural field which could increase continuity order and  
453 connectivity degree of macropores systems were preferential management practices. Furthermore, the occurrence of  
454 preferential flow originates from the spatial variations in water flow velocity due to major heterogeneities in soil  
455 profiles. Zhang et al. (2017) stated that preferential flow dye patterns in the soil profiles were highly different in stony  
456 soils and they implied that the spatial heterogeneity of stony soils, especially the occurrence of rock fragments  
457 distribution, prompted the results. The occurrence of preferential flow pathways tend to be rich in the place where  
458 near-ponding conditions takes place on the soil surface or where water flow encounters less permeable layers within  
459 the soil profiles or where vegetation canopy architecture adjusts the redistribution of precipitation above soil surface  
460 (Bogner et al., 2013). Preferential flow pathways are complex networks of large pores and void spaces within soils  
461 which are typically formed by living or decaying root-induced channels, soil biota, soil fauna, soil cracks,  
462 drying-wetting cycles and freezing-thawing process. For example, root-induced channels within topsoil constitute main  
463 preferential flow pathways, while unstable water transfer from preferential flow pathways to the surrounding soil  
464 matrix occurs because root biomass decreases in subsoil. Preferential flow along root-induced channels could carry  
465 large amount of bacteria. Root-induced channels as preferential flow pathways due to roots shrink provide more space  
466 for water flow. Moreover, root-induced channels harbor high amounts of bacteria than the surrounding soil matrix and  
467 are hot spots of bacteria activity (Dibbern et al., 2014). Larger and deeper root systems constitute a complex network  
468 within the soil profile for alfalfa cultivation-a perennial and long lived plant-than wheat cultivation-an annual and short  
469 lived plant. Decayed alfalfa root systems could create more preferential flow pathways (Yousefi et al., 2014). For soil  
470 cracks and biopores, higher water infiltration rate occurs in cracked soils and this rate decreases when cracks are closed  
471 during wetting. Preferential flow in cracked soils was a matter of very short time due to crack closure resulted from



472 rapid and heterogeneous swelling processes (Liu et al., 2003). However, other researchers stated that cracks did not  
473 close after rewetting, leading to high water infiltration during wetting. Soil cracks remain preferential flow pathways  
474 even after they are closed on soil surface (Zhang et al., 2014). The drivers, occurrence mechanisms, types, degrees and  
475 properties of preferential flow (Fig. 6) could be better assessed and predicted in soil hydrology if a potentially glance  
476 of interdisciplinary, in particular soil physics, soil chemistry, soil biology and plant physiology, is considered (Zhang et  
477 al., 2016a).

478 Preferential flow could displace older water stored in the surrounding soil matrix deeper into the soil even into the  
479 streams. The interactions between preferential flow pathways and the surrounding soil matrix affect the ability of  
480 solute transport based on different soil water content conditions (Laine-Kaulio et al., 2014). At the primary stage, the  
481 dominant water transfer is from the preferential flow pathways into the surrounding soil matrix when the water content  
482 is lower in the surrounding soil matrix than that in the preferential flow pathways. Meanwhile, interactions between  
483 preferential flow pathways and the surrounding soil matrix increase with the sand content (Bogner et al., 2012).  
484 Preferential flow and soil matrix flow are the typical two regimes of water flow within the soil profiles (Hirashima et  
485 al., 2014). Soil matrix flow is a relatively slow and even movement of water and solutes through the bulk soil (Stamm  
486 et al., 1998; Allaire et al., 2009). Soil physicochemical and biological properties may be different between preferential  
487 flow pathways and the surrounding soil matrix (Bogner et al., 2012). Preferential flow pathways not only determine the  
488 spatial pattern of solutes but also exert vital significance on soil properties and are regarded as a contaminant sink on  
489 the basis of contaminant species (Garrido, et al., 2014; Zhang et al., 2016b). The high organic matter content in the  
490 preferential flow pathways was attributed to three main sources: greater proportion of living or decayed roots in  
491 preferential flow pathways than in the surrounding soil matrix; preferential input of dissolved organic matter from the  
492 surface; enhanced release of microbial biomass C from rewetting of relatively dry soil (Morales et al., 2010). Mass  
493 transfer between preferential flow pathways and the surrounding soil matrix is typically common and also different



494 from soil texture, soil organic matter content, land coverage type and so forth (Jarvis et al., 2007; Alaoui et al., 2011;  
495 Backnäs et al., 2012; Zhang et al., 2017). Martin and Dean (2001) who treated the surrounding soil matrix as reservoir  
496 effect identified that water with high permeability and hydraulic conductivity exchanged between preferential flow  
497 pathways and the surrounding soil matrix. Peterson and Wicks (2005) concluded that only 1% of the volume of water  
498 and <<1% of the amount of solute moved from preferential flow pathways to the surrounding soil matrix. However,  
499 they did not regard the surrounding soil matrix as a reservoir in fact. Mohanty et al. (2016) concluded that extent of  
500 hysteresis increased with increases in exchange of water and solute between preferential flow pathways and the  
501 surrounding soil matrix. The surrounding soil matrix exchanged the old infiltrating water with new infiltrating water  
502 during successive infiltration (Mohanty et al., 2016). Preferential flow not only exerts significant effects on both  
503 surface water and groundwater security but also affects the physical hydrological processes to precipitation (Beven and  
504 Germann, 2013; Khan et al., 2016). Quantification and characterization of preferential flow is vital for groundwater  
505 recharge, waste disposal risk assessment, contaminants spatial pattern and heavy metal redistribution in soils  
506 (Saravanathiiban et al., 2014). In particular, the topic of preferential flow is of generally high significance and  
507 scientific interest, but it is too complex to be solved from a theoretical and experimental point. However, despite  
508 the increasing number of papers published on the topic, there has not been as much attention paid to preferential flows  
509 as we might have expected, given its significance in all areas of soil and catchment hydrology, water quality, slope  
510 stability and agricultural management.

511

### 512 **3.2.3 Preferential flow future challenges**

513 Given the growing interests of preferential flow in past few years worldwide, a real opportunity and challenge of  
514 preferential flow studies from a global perspective in future occurs for hydrologists. Given the unpredictable  
515 significance of preferential flow in all areas of large scale catchment hydrological processes, groundwater resources





516 security, agricultural non-point source pollution, and soil heavy metal pollution, large number of unanswered questions

517 and disputes still confuse researchers (Beven and Germann, 2013).

518 The proposed suggestions are on the following topics, but not limited to:

519 • Any new theory of preferential flow, in particular mathematical models, needs to be rigorously tested with wider  
520 range of experimental data. A fully convincing integrated physical theory still has not yet been achieved (Beven, 2010).

521 • Yet to date, however, most preferential flow studies have focused on its drivers, with limitation of studies  
522 implying the space-time changes, mathematical models, new measurement techniques and theoretical approaches  
523 predicting the process of preferential flow accurately. It is noteworthy that preferential flow effects are generally  
524 ignored in lumped hydrological models even physically based models (Weiler, 2017). Integration of all the purported  
525 drivers, in particular preferential flow, into mathematical models framework is required to achieve the fully integrated  
526 analysis. An active field for future research needs to extend, develop and assess the effects of preferential flow on  
527 models sensitivity within multiscale.

528 • There is an urgent need to greatly enhance our ability to imply a wide range of unpredictable preferential flow  
529 process under different environments.

530 • When and how does water flow through preferential flow pathways within the soils? How does water in  
531 preferential flow pathways interact with water in the surrounding soil matrix? How does solute exchange between  
532 preferential flow pathways and the surrounding soil matrix? How important are preferential flow pathways in terms of  
533 water flow at the hillslope or catchment scales? How does solute process adsorption and degradation on preferential  
534 flow pathways walls? These need to be investigated further (Beven and Germann, 2013).

535 • Does preferential flow matter at catchment scales? Preferential flow occurs only during specific conditions linked  
536 to soil water content, soil properties, high precipitation and so forth. However, these conditions could not be met to  
537 assess hydrographs in the long run due to the small proportion of preferential flow time. Thus hydrologists suppose



538 that preferential flow does not matter at catchment scales. It is not the case in some way.

539 Even if some questions still remain unresolved, our understanding of preferential flow in the vadose zone is  
540 continuing to be facilitated.

541

### 542 **3.3 Water flow and preferential flow pathways: A love-hate relationship**

543 Before we deal with the topic, it is worthwhile to clearly understand the progress of water flow and preferential  
544 flow, respectively. In recent advances, studies have implied that water flow in the vadose zone often occurs through a  
545 small fraction of the soil along preferential flow pathways. Groundwater quality could be influenced by the arrival of  
546 both dissolved and suspended contaminants which are carried by gravity-driven water flow through preferential flow  
547 pathways to the water table. There is increasing doubt that whether a love-hate relationship between water flow and  
548 preferential flow pathways. Recently, Weiler (2017) presented a review and study on the relationship between  
549 macropores and preferential flow. This study concluded that preferential flow is of high relevance for surface water  
550 flow in the soil or watershed. In previous studies, Beven and Germann (1982, 2013) also discussed the relationship  
551 between macropores and water flow extensively. Even more importantly, it is indeed evident that recent and precious  
552 studies have conducted limiting assessment to state the importance of macropores on water flow or preferential flow.  
553 Hydrologists had a love-hate relationship with water flow and preferential flow pathways like a love-hate relationship  
554 between water flow and preferential flow pathways (Fig. 7). A complex relationship between water flow and  
555 preferential flow pathways emerges early at birth and continues throughout life. Even though water flow and  
556 preferential flow pathways have been extensively concluded, their interaction remains obscure. Hence, it becomes  
557 immediately clear to have insights on the love-hate relationship between water flow and preferential flow pathways.  
558 The interaction between water flow and preferential flow pathways becomes crucial in situations when water security  
559 and scarcity could be controlled by its interaction.



560

### 561 **3.3.1 Water flow through preferential flow pathways at profile, plot, and field scales**

562 The most convincing evidence of the occurrence of water flow through preferential flow pathways at profile and  
563 plot scales has come from dye tracing experiments (Flury et al., 1994; Zehe and Flühler, 2001; Hagedorn and Bundt,  
564 2002; Öhrström et al., 2002; Kamolpornwijit et al., 2003; Morris and Mooney, 2004; Köhne et al., 2006; Mooney and  
565 Morris, 2008; Klaus and Zehe, 2010; Backnäs et al., 2012; Bargúes Tobella et al., 2014; Mossadeghi-Björklund et al.,  
566 2016; Zhang et al., 2017). Water flow through preferential flow pathways at profile and plot scales could be achieved  
567 from the continuous change of dye tracers (i.e., Brilliant Blue, Bromide, Chloride and so forth). Hagedorn and Bundt  
568 (2002), Backnäs et al. (2012) for example concluded difference of the chemical properties between preferential flow  
569 pathways and the surrounding soil matrix by dye tracing patterns. Morris and Mooney (2004) stated that water flow  
570 through preferential flow pathways recorded as instantaneous responses both in the 50- and 130-mm probes using TDR  
571 and showed that preferential flow pathways might be responsible for a significant portion of the total water flow in  
572 light of the breakthrough curve results (Mooney and Morris, 2008). Köhne et al. (2006) stated that water flow through  
573 preferential flow pathways at column scales could not be predicted accurately based on water flow and solute  
574 concentration data used in dual porosity model. Dye staining patterns may not reveal all preferential flow pathways  
575 within soil profiles in fact (Beven and Germann, 2013). However, at field scales, the convincing evidence of water  
576 flow through preferential flow pathways tends to be indirect and may be inferred from the response of tracer  
577 concentration at some point. In light of the studies of water flow through preferential flow pathways at field scales, it is  
578 typically interesting to understand why solutes (i.e., nutrients, contaminants and so forth) could be reported at depths  
579 much greater than would be expected in groundwater table. In general, contaminants could be carried by water flow  
580 through preferential flow pathways to the groundwater table quickly. It is also clearly evident that researchers conduct  
581 a wide range of studies to quantify the effects of preferential flow on contaminants transport by mathematical



582 modelling and promising methodology. These studies could ahead clarify the origin of groundwater pollution and  
583 could also benefit for water resources sustainability. Therefore, from the groundwater security perspectives, we  
584 conclude that a hate relationship between water flow and preferential flow pathways because water flow could carry  
585 more contaminants and pesticides to the groundwater table through a small portion of preferential flow pathways.

586 However, with respect to the nutrients availability in the rhizosphere, it is well known that plant roots not only  
587 grow into the preferential flow pathways within the soil profiles but also form lots of preferential channels themselves  
588 and that there is a love relationship between water flow and preferential flow pathways. Preferential flow pathways  
589 have higher amounts of nutrients and organic matters than the surrounding soil matrix, which prompts plant growth. In  
590 general, preferential flow pathways are regarded as storage of micro-organism, nutrients and organic matters. During  
591 plant growth, root systems must absorb more soil water and nutrients to maintain their sustainability. Water flow  
592 carrying nutrients to the rhizosphere quickly through preferential flow pathways is benefit for plant growth, because  
593 preferential flow pathways could be treated as storage of organic matters. The framework could benefit for the plant  
594 growth, as well as agricultural crop production, because preferential flow pathways could be persistent for decades.

595

### 596 **3.3.2 Water flow through preferential flow pathways at hillslope scales**

597 Hillslopes act as filters for water flow to the surface water bodies or even to the groundwater table in many  
598 landscapes. Water flow through preferential flow pathways at hillslope scales is highly related to morphological  
599 properties like regolith, glacial till and bed rock (Beven and Germann, 2013). There are now a wide range of studies  
600 concluding that preferential flow might be crucial in controlling hillslope hydrological processes. Interests in the role  
601 of preferential flow in hillslope hydrology have increased dramatically (Leaney et al., 1993; Guebert and Gardner,  
602 2001; van Schaik et al., 2008; Anderson et al., 2009; Klaus et al., 2013; Guo et al., 2014). Noguchi et al. (1999) for  
603 example concluded that water flow through preferential flow pathways formed by living or decayed roots, bedrock



604 fractures might be important in determining hydrological processes at hillslope scales. Anderson et al. (2009) stated  
605 that preferential flow pathways carried most of water flow during storms at hillslope scales due to the very small  
606 groundwater table responses.

607 A hate relationship between water flow and preferential flow pathways is also necessarily concluded from the  
608 perspective of debris-water flow acceleration and subsurface storm-water flow especially under wet conditions and  
609 high precipitation. With regard to debris-water flow on the land surface, preferential flow pathways provide the nearest  
610 channels for this process. It is typically clear that the property of sheet or splash erosion could make the surface  
611 smoothly by eroding clods to flat the roughness and in final to fill the depression with the sediments, which leads the  
612 increase of surface water flow on the land surface and the decrease of storing water for the depression during high  
613 precipitation. In particular, once the spilling process is initiated in the depression, preferential flow pathways occur  
614 among these depressions along the steep slope. Preferential flow pathways on the land surface could prompt, route and  
615 concentrate the surface water flow, sediment, gravel and stone transport with high water flow velocity due to high  
616 precipitation (Peñuela et al., 2016). The synthesis of turbulent surface water flow, sediment and gravel is the origin of  
617 debris-water flow which exerts a hate relationship with preferential flow pathways on the land surface.

618 For subsurface storm-water flow at hillslope scales, this water flow as a term of repaid water flow through  
619 preferential flow pathways with much higher water flow velocity than the surrounding soil matrix dominates hillslope  
620 hydrology and also has a hate relationship with preferential flow pathways when we address hillslope stability and  
621 landslides. Where preferential flow pathways are crucial parts of subsurface water systems, these pathways could feed  
622 water to make water pressures develop. As the landslide develops, the water storage continues to feed water even  
623 drainage occurs. Subsurface storm-water flow may develop to accelerate as landslide happens (Hencher, 2010).  
624 Preferential flow pathways are dramatically treated as conduits of subsurface storm-water flow in hillslopes. Rapid  
625 subsurface storm-water flow depends on the fluxes of both vertical and lateral preferential flow pathways (van Schaik



626 et al., 2008; Nieber and Sidle, 2010). Subsurface storm-water flow at hillslope scales is a combination of preferential  
627 flow and soil matrix flow. Leaney et al. (1993) concluded that > 90% subsurface storm-water flow was mainly carried  
628 by preferential flow pathways bypassing the surrounding soil matrix; Anderson et al. (2009) stated that subsurface  
629 storm-water flow velocity was governed by the connectivity of hillslope preferential flow pathways. Stumpp and  
630 Maloszweski (2010) found the contribution of preferential flow pathways to subsurface storm-water flow was between  
631 1.1 and 4.3% for the lumped parameter approach and 1.1 and 20.5% for the HYDRUS 1-D approach, respectively;  
632 Vogel et al. (2010) found that only 24% subsurface storm-water flow was transported through preferential flow  
633 pathways. Repaid subsurface storm-water flow through preferential flow pathways processes could affect the stability  
634 of hillslopes for addressing issues of hillslope sustainability, storm water management and other hydrological and  
635 biogeochemical responses.

636

### 637 **3.3.3 Water flow through preferential flow pathways at catchment scales**

638 If water flow through preferential flow pathways is crucial at hillslope scales then it is also crucial at catchment  
639 scales (Beven and Germann, 2013). However, evaluation of water flow through preferential flow pathways at  
640 catchment scales remains in question because of the high temporal and spatial heterogeneity of water flow dynamics  
641 (Allaire et al., 2009; Beven, 2010; Darracq et al., 2010; Godsey et al., 2010; Beven and Germann, 2013; Wiekenkamp  
642 et al., 2016). The geometry, connectivity and tortuosity of preferential flow pathways networks remain an issue in  
643 practice at catchment scales than that at soil columns scales (Ghafoor et al., 2013). Direct tracing of water flow through  
644 preferential flow pathways remains an issue even at zero-order catchment scales. A promising technique to assess  
645 space-time dynamics of preferential flow at catchment scales is the use of sensor response times (Hardie et al., 2013;  
646 Liu and Lin, 2015; Wiekenkamp et al., 2016). Christiansen et al. (2004) found that preferential flow pathways had  
647 significant influences on contaminants leaching into the groundwater table at catchment scales though preferential flow



648 pathways had no dominating influences on groundwater recharge or discharge at catchment scales. Wiekenkamp et al.  
649 (2016) concluded that the spatial and temporal occurrence of water flow through preferential flow pathways using  
650 sensor response times was triggered by the amount and intensity of precipitation at catchment scales. Moreover, public  
651 authorities need integrated large-scale models and decision-support tools that can decide the effects of water flow  
652 through preferential flow pathways on contaminants leaching at catchment scales.

653 All hydrological processes are irregular in temporal and spatial scales and water flow through preferential flow  
654 pathways may be measured everywhere (Uhlenbrook, 2006). A hydrological processes phenomenon, for example,  
655 flooding-water flow originating from a catchment, varies with high heterogeneity. Flooding-water flow displaced from  
656 those surface water bodies (i.e., rivers, lakes, reservoirs and so forth) in a catchment. The connectivity of surface water  
657 bodies and preferential flow pathways in the catchment may prompt the understanding of rapid water flow  
658 contributions to the flooding events. A hate relationship between water flow and preferential flow pathways is also  
659 necessarily concluded from the perspective of flooding-water flow at catchment scales. For flooding-water flow during  
660 extreme storm events, it is widely known that hillslope acts as a buffer of temporary storage to reduce the capacity of  
661 flooding-water flow and the damage caused by flooding. However, frequency of flooding is typically high due to the  
662 increased influences of human activities and climate variabilities. Along the disastrous flooding-water flow, water flow  
663 is driven by gravity, tends to be downhill without resistance, and even disturbs urban traffic, submerges village, and  
664 endangers human life. Flooding-water flow will be accelerated as the process passes through the flatting areas or  
665 through the areas with micro- or macro-gradient. These areas could be referred to preferential flow pathways in some  
666 way. In particular, flooding-water flow to the nearest areas without resistance by preferential flow pathways could take  
667 more serious disasters.

668

669 **3.3.4 Virtual water flow through preferential flow pathways in socio-hydrology**



670 It is not indeed immediately clear for the assessment of virtual water flow from socio-hydrological perspectives.  
671 Considering previous studies, it is clearly stated that these papers only assess the volume of virtual water flow of  
672 products in the regions or in the world. However, it is our opinion that which is preferential type of crop product to  
673 import, preferential choice of country to export products, preferential choice of tax to import or export products along  
674 virtual water flow trade, to alleviate water security and scarcity, these questions should be assessed immediately. Then  
675 the question arises: how does water stress could be alleviated from the perspective of virtual water flow and  
676 preferential flow pathways along regional or national or global virtual water flow trade. It is due to the presence of  
677 preferential policy (i.e., trade, tax, human needs and so forth) conducted to make water resources sustainability. In light  
678 of the socio-hydrological perspectives, these preferential policies along virtual water flow trade could form a global  
679 framework in some way to alleviate global water crisis. For example, the policy makers could decide which crop  
680 should be imported or exported preferentially with virtual water flow pattern from other regions or countries to keep  
681 real water balance. However, it is not optimistic because of water allocation rule, demand management practices,  
682 current policy, history, political security, food security, local economy and environments. Although global virtual water  
683 flow trade has a complex network structure and is increasingly complex dynamic system, in fact, preferential bilateral  
684 agreement between countries and multilateral trade agreements could enhance global virtual water flow trade in some  
685 way. Policy and decision makers should consider both short and long term virtual water flow trade plan based on those  
686 preferential trade agreements from network perspectives. Therefore, preferential virtual water flow trade agreements  
687 between regions or countries should open quickly to alleviate global water crisis.

688 In this section, “preferential flow pathways” is not the term of real preferential flow pathways which could prompt  
689 repaid water flow without resistance from physical and hydrological perspectives. However, “preferential flow  
690 pathways” is related to the preferential policy adjustment during virtual water flow trade between regions or countries.  
691 In general, this “preferential flow pathways” is mainly controlled by policy makers and could make global water





692 balance in some way if the adjustment is fully considered. In general, we could not avoid some facts that virtual water  
693 flow is transferred from regions poor in water resources to regions rich in water resources. If the preferential policy is  
694 took on with global endeavors, more water resources will be saved during virtual water flow transfer. The policy  
695 makers could decide which kind of crop products should be preferentially imported from other countries to alleviate  
696 water crisis. For example, China is a net importer of virtual water flow in agricultural products, especially soy. Chinese  
697 government set out to import soy products instead of other agricultural products because of their necessity for human  
698 life, livestock feed and their much higher virtual water content during production than paddy, wheat, maize and so  
699 forth, in particular because of their low yield during production. Chinese farmers also realize that no more incomes  
700 from soy production. Therefore, the policy makers of China import more soy with the form of virtual water flow from  
701 other countries preferentially to alleviate serious water stress in some way. Apart from the preferential virtual water  
702 flow trade, policy and tax in alleviating water crisis, real water transfer from rich regions should also be considered  
703 preferentially. Regions rich in water resources not only satisfy their needs but also provide water sustainability for  
704 regions poor in water resources. In particular for policy makers, they clearly understand which is more necessary to  
705 make water resources available. For example, water resources from Hebei Province or nearby Beijing regions should  
706 supply the development areas, in particular Beijing, preferentially. It is clearly noted that almost 70% water resources  
707 of Beijing is from Miyun Reservoir, Beijing. Recently, Chinese government set out to make an agenda for the  
708 development of Jing-Jin-Ji region, China to prompt people in these areas more improvement. The policy that water  
709 resources should be supplied for Beijing preferentially might alleviate water crisis of Beijing in some way. In addition  
710 to the real water resources supplied for Beijing preferentially, the most developed area of Beijing must also import  
711 more virtual water from other regions or countries. A love relationship between virtual water flow and “preferential  
712 flow pathways” is necessarily indicated in light of the virtual water flow transfer from socio-hydrological perspectives.  
713



#### 714 **4. Conclusions**

715 The large number of studies reviewed in this paper show that there is a promising development of water flow and  
716 preferential flow from 1995 to 2015 though lots of questions have not been unresolved yet to date. People set out to  
717 alleviate water resources considering the human-society-water-food-energy nexus from socio-hydrological  
718 perspectives instead of concentrating on studies in physical hydrology only. So it is evident from the literatures that  
719 there is a need to consider the complex relationship between water flow and preferential flow pathways. This review of  
720 the topic then leads to the development of an integrated study on water flow. In addition, based on this review, further  
721 work could include as the inter-disciplines are proposed.

722

#### 723 **Acknowledgements**

724 This research was supported by the National Natural Science Foundation of China (41271044) and the  
725 Fundamental Research Funds for the Central Universities (2015ZCQBH-01). Authors were also grateful to reviewers  
726 and editors for their comments and suggestions.

727

#### 728 **References**

729 Abou Najm, M.R., Jabro, J.D., Iversen, W.M., et al. 2009. New method for the characterization of three-dimensional preferential flow  
730 paths in the field. *Water Resources Research*, 46, W02503 (2009). doi 10.1029/2009WR008594.

731 Alaoui, A. 2015. Modelling susceptibility of grassland soil to macropore flow. *Journal of Hydrology*, 525, 536-546.

732 Alaoui, A., Caduff, U., Gerke, H.H., et al. 2011. Preferential flow effects on infiltration and runoff in grassland and forest soils. *Vadose*  
733 *Zone Journal*, 10, 367-377.

734 Algeet-Abarquero, N., Marchamalo, M., Bonatti, J., et al. 2015. Implications of land use change on runoff generation at the plot scale in  
735 the humid tropics of Costa Rica. *Catena*, 135, 263-270.

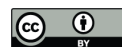

- 736 Allaire, S.E., Roulier, S., Cessna, A.J. 2009. Quantifying preferential flow in soils: A review of different techniques. *Journal of Hydrology*,  
737 378(1), 179-204.
- 738 Allan, J.A. 1997. *'Virtual water': a long term solution for water short Middle Eastern economies?.* (pp. 24-29). London: School of Oriental  
739 and African Studies, University of London.
- 740 Alley, W.M., Healy, R.W., LaBaugh, J.W., et al., 2002. Flow and storage in groundwater systems. *Science*, 296(5575), 1985-1990.
- 741 Anderson, A.E., Weiler, M., Alila, Y., et al. 2009. Subsurface flow velocities in a hillslope with lateral preferential flow. *Water Resources*  
742 *Research*, 45(11). doi:10.1029/2008WR007121.
- 743 Antonelli, M., Roson, R., Sartori, M. 2012. Systemic input-output computation of green and blue virtual water 'flows' with an illustration  
744 for the Mediterranean region. *Water Resources Management*, 26(14), 4133-4146.
- 745 Backnäs, S., Laine-Kaulio, H., Kløve, B. 2012. Phosphorus forms and related soil chemistry in preferential flow paths and the soil matrix  
746 of a forested podzolic till soil profile. *Geoderma*, 189-190, 50-64.
- 747 Bargués Tobella, A., Reese, H., Almaw, A., et al. 2014. The effect of trees on preferential flow and soil infiltrability in an agroforestry  
748 parkland in semiarid Burkina Faso. *Water Resources Research*, 50(4), 3342-3354.
- 749 Barnett, J., Rogers, S., Webber, M., et al. 2015. Sustainability: transfer project cannot meet China's water needs. *Nature*, 527, 295-297.
- 750 Benegas, L., Ilstedt, U., Roupsard, O., et al. 2014. Effects of trees on infiltrability and preferential flow in two contrasting agroecosystems  
751 in Central America. *Agriculture, Ecosystems & Environment*, 183, 185-196.
- 752 Bero, N.J., Ruark, M.D., Lowery, B. 2016. Bromide and chloride tracer application to determine sufficiency of plot size and well depth  
753 placement to capture preferential flow and solute leaching. *Geoderma*, 262, 94-100.
- 754 Beven, K., Germann, P. 1982. Macropores and water flow in soils. *Water Resources Research*, 18(5), 1311-1325.
- 755 Beven, K., Germann, P. 2013. Macropores and water flow in soils revisited. *Water Resources Research*, 49(6), 3071-3092.
- 756 Beven, K.J. 2010. Preferential flows and travel time distributions: defining adequate hypothesis tests for hydrological process models.  
757 *Hydrological Processes*, 24(12), 1537-1547.



- 758 Bittelli, M., Ventura, F., Campbell, G.S., et al., 2008. Coupling of heat, water vapor, and liquid water fluxes to compute evaporation in bare  
759 soils. *Journal of Hydrology*, 362(3), 191-205.
- 760 Blair, P., Buytaert, W. 2016. Socio-hydrological modelling: a review asking "why, what and how?". *Hydrology and Earth System Sciences*,  
761 20(1), 443-478.
- 762 Bogner, C., Borcken, W., Huwe, B. 2012. Impact of preferential flow on soil chemistry of a podzol. *Geoderma*, 175, 37-46.
- 763 Bogner, C., Gaul, D., Kolb, A., et al., 2010. Investigating flow mechanisms in a forest soil by mixed-effects modelling. *European Journal*  
764 *of Soil Science*, 61, 1079-1090.
- 765 Bogner, C., Mirzaei, M., Ruy, S., et al. 2013. Microtopography, water storage and flow patterns in a fine-textured soil under agricultural  
766 use. *Hydrological Processes*, 27(12), 1797-1806.
- 767 Boostani, M., Karimi, H., Azizi, S. 2017. Heat transfer to oil-water flow in horizontal and inclined pipes: Experimental investigation and  
768 ANN modeling. *International Journal of Thermal Sciences*, 111, 340-350.
- 769 Bouma, J., Dekker, L.W. 1978. A case study on infiltration into dry clay soil I. Morphological observations. *Geoderma*, 20(1), 27-40.
- 770 Brunner, P., Simmons, C.T. 2012. HydroGeoSphere: a fully integrated, physically based hydrological model. *Ground Water*, 50(2),  
771 170-176.
- 772 Buendia, C., Batalla, R.J., Sabater, S., et al. 2016. Runoff trends driven by climate and afforestation in a Pyrenean basin. *Land Degradation*  
773 *& Development*, 27(3), 823-838.
- 774 Bundt, M., Albrecht, A., Froidevaux, P. et al. 2000. Impacts of preferential flow on radionuclide distribution in soil. *Environmental Science*  
775 *& Technology*, 34(18), 3895-3899.
- 776 Cazcarro, I., Hoekstra, A.Y., Chóliz, J.S. 2014. The water footprint of tourism in Spain. *Tourism Management*, 40, 90-101.
- 777 Cerdà, A. 1996. Seasonal variability of infiltration rates under contrasting slope conditions in Southeast Spain. *Geoderma*, 69, 217-232.
- 778 Cerdà, A. 1998. Changes in overland flow and infiltration after a rangeland fire in a Mediterranean scrubland. *Hydrological Processes*, 12,  
779 1031-1042.



- 780 Cerdà, A. 2001. Effects of rock fragment cover on soil infiltration, integral runoff and erosion. *European Journal of Soil Science*, 52,  
781 59-68.
- 782 Cerdà, A., Jurgensen, M. F. 2008. The influence of ants on soil and water losses from an orange orchard in eastern Spain. *Journal of*  
783 *Applied Entomology*, 132 (4), 306-314.
- 784 Cerdà, A., Lavee, H. 1999. The Effect of Grazing on Soil and Water Losses Under Arid and Mediterranean Climates. Implications for  
785 Desertification. *Pirineos*, 153-154: 159-174.
- 786 Chamizo, S., Rodríguez-Caballero, E., Cantón, Y., et al. 2015. Penetration resistance of biological soil crusts and its dynamics after crust  
787 removal: Relationships with runoff and soil detachment. *Catena*, 126, 164-172.
- 788 Chapagain, A.K., Hoekstra, A.Y., Savenije, H.H.G. 2006. Water saving through international trade of agricultural products. *Hydrology and*  
789 *Earth System Sciences*, 10(3), 455-468.
- 790 Chen, X., Wang, D. 2015. Modeling seasonal surface runoff and base flow based on the generalized proportionality hypothesis. *Journal of*  
791 *Hydrology*, 527, 367-379.
- 792 Christiansen, J.S., Thorsen, M., Clausen, T., et al. 2004. Modelling of macropore flow and transport processes at catchment scale. *Journal*  
793 *of Hydrology*, 299(1), 136-158.
- 794 Clothier, B.E., Green, S.R., Deurer, M. 2008. Preferential flow and transport in soil: progress and prognosis. *European Journal of Soil*  
795 *Science*, 59, 2-13.
- 796 Coppola, A., Comegna, A., Dragonetti, G., et al. 2015. Simulated preferential water flow and solute transport in shrinking soils. *Vadose*  
797 *Zone Journal*, 14(9). doi:10.2136/vzj2015.02.0021.
- 798 Cote, C.M., Bristow, K.L., Ross, P.L. 2000. Increasing the efficiency of solute leaching: impacts of flow interruption with drainage of the  
799 preferential flow paths. *Journal of Contaminant Hydrology*, 43(3/4), 191-209.
- 800 Crane, R.A., Cuthbert, M.O., Timms, W. 2015. Technical Note: The use of an interrupted-flow centrifugation method to characterise  
801 preferential flow in low permeability media. *Hydrology and Earth System Sciences*, 19(9), 3991-4000.



- 802 da Silva, V.D.P.R., de Oliveira, S.D., Hoekstra, A.Y., et al. 2016. Water Footprint and Virtual Water Trade of Brazil. *Water*, 8(11), 517.
- 803 Dabrowski, J.M., Murray, K., Ashton, P.J., et al. 2009. Agricultural impacts on water quality and implications for virtual water trading  
804 decisions. *Ecological Economics*, 68(4), 1074-1082.
- 805 Dalin, C., Hanasaki, N., Qiu, H., et al. 2014. Water resources transfers through Chinese interprovincial and foreign food trade. *Proceedings*  
806 *of the National Academy of Sciences*, 111(27), 9774-9779.
- 807 Dang, Q., Lin, X., Konar, M. 2015. Agricultural virtual water flows within the United States. *Water Resources Research*, 51(2), 973-986.
- 808 Dankers, R., Arnell, N.W., Clark, D.B., et al. 2014. First look at changes in flood hazard in the Inter-Sectoral Impact Model  
809 Intercomparison Project ensemble. *Proceedings of the National Academy of Sciences*, 111(9), 3257-3261.
- 810 Darracq, A., Destouni, G., Persson, K., et al. 2010. Scale and model resolution effects on the distributions of advective solute travel times  
811 in catchments. *Hydrological Processes*, 24(12), 1697-1710.
- 812 de Graaf, I.E., Sutanudjaja, M., Van Beek, E.H., et al., 2015. A high-resolution global-scale groundwater model. *Hydrology and Earth*  
813 *System Sciences*, 19(2), 823-837.
- 814 Derx, J., Blaschke, A.P., Farnleitner, A.H., et al. 2013. Effects of fluctuations in river water level on virus removal by bank filtration and  
815 aquifer passage—a scenario analysis. *Journal of Contaminant Hydrology*, 147, 34-44.
- 816 Devitt, D.A., Smith, S.D., 2002. Root channel macropores enhance downward movement of water in a Mojave Desert ecosystem. *Journal*  
817 *of Arid Environment*, 50, 99-108.
- 818 Di Baldassarre, G., Viglione, A., Carr, G., et al. 2013. Socio-hydrology: conceptualising human-flood interactions. *Hydrology and Earth*  
819 *System Sciences*, 17(8), 3295-3303.
- 820 Di Baldassarre, G., Viglione, A., Carr, G., et al., 2015. Debates—Perspectives on socio-hydrology: Capturing feedbacks between physical  
821 and social processes, *Water Resources Research*, 51. doi:10.1002/2014WR016416.
- 822 Dibbern, D., Schmalwasser, A., Lueders, T., et al. 2014. Selective transport of plant root-associated bacterial populations in agricultural  
823 soils upon snowmelt. *Soil Biology and Biochemistry*, 69, 187-196.



- 824 Dong, H., Geng, Y., Fujita, T., et al. 2014. Uncovering regional disparity of China's water footprint and inter-provincial virtual water flows.  
825 Science of the Total Environment, 500, 120-130.
- 826 Dusek, J., Vogel, T. 2014. Modeling subsurface hillslope runoff dominated by preferential flow: One-vs. two-dimensional approximation.  
827 Vadose Zone Journal, 13(6). doi:10.2136/vzj2013.05.0082.
- 828 Elliott, J., Deryng, D., Müller, C., et al. 2014. Constraints and potentials of future irrigation water availability on agricultural production  
829 under climate change. Proceedings of the National Academy of Sciences, 111(9), 3239-3244.
- 830 Elshafei, Y., Sivapalan, M., Tonts, M., et al. 2014. A prototype framework for models of socio-hydrology: identification of key feedback  
831 loops and parameterisation approach. Hydrology and Earth System Sciences, 18(6), 2141-2166.
- 832 Emmanuel, I., Andrieu, H., Leblois, E., et al. 2015. Influence of rainfall spatial variability on rainfall-runoff modelling: Benefit of a  
833 simulation approach?. Journal of Hydrology, 531, 337-348.
- 834 Engelhardt, I., Barth, J.A.C., Bol, R., et al., 2014. Quantification of long-term wastewater fluxes at the surface water/groundwater-interface:  
835 an integrative model perspective using stable isotopes and acesulfame. Science of the Total Environment, 466, 16-25.
- 836 Engler, A. 1919. *Untersuchungen über den Einfluss des Waldes auf den **Satnd** der Gewässer*. Zürich: Kommissionsverlag von Beer. p 626.
- 837 Etana, A., Larsbo, M., Keller, T., et al. 2013. Persistent subsoil compaction and its effects on preferential flow patterns in a loamy till soil.  
838 Geoderma, 192, 430-436.
- 839 Falkenmark, M., Rockström, J., 2006. The new blue and green water paradigm: Breaking new ground for water resources planning and  
840 management. Journal of Water Resources Planning and Management, 132 (3), 129-132.
- 841 Felder, S., Chanson, H. 2016. Air-water flow characteristics in high-velocity free-surface flows with 50% void fraction. International  
842 Journal of Multiphase Flow, 85, 186-195.
- 843 Felder, S., Pfister, M. 2017. Comparative analyses of phase-detective intrusive probes in high-velocity air-water flows. International  
844 Journal of Multiphase Flow, 90, 88-101.
- 845 Feng, K., Siu, Y.L., Guan, D., et al. 2012. Assessing regional virtual water flows and water footprints in the Yellow River Basin, China: A



- 846 consumption based approach. *Applied Geography*, 32(2), 691-701.
- 847 Field, C., Jackson, R., Mooney, H. 1995. Stomatal responses to increased CO<sub>2</sub>: implications from the plant to the global-scale. *Plant Cell*  
848 and *Environment*, 18, 1214-1255.
- 849 Flach, R., Ran, Y., Godar, J., et al. 2016. Towards more spatially explicit assessments of virtual water flows: linking local water use and  
850 scarcity to global demand of Brazilian farming commodities. *Environmental Research Letters*, 11(7), 075003.  
851 <https://doi.org/10.1088/1748-9326/11/7/075003>.
- 852 Flury, M., Fliihler, H., Jury, W.A., et al. 1994. Susceptibility of soils to preferential flow of water: a field study. *Water Resources Research*,  
853 30, 1945-1954.
- 854 Forsmann, D.M., Kjaergaard, C. 2014. Phosphorus release from anaerobic peat soils during convective discharge—Effect of soil Fe: P  
855 molar ratio and preferential flow. *Geoderma*, 223, 21-32.
- 856 Fountain, A.G., Jacobel, R.W., Schlichting, R., et al. 2005. Fractures as the main pathways of water flow in temperate glaciers. *Nature*,  
857 433(7026), 618-621.
- 858 Fracasso, A., Sartori, M., Schiavo, S. 2016. Determinants of virtual water flows in the Mediterranean. *Science of the Total Environment*,  
859 543, 1054-1062.
- 860 Franklin, D.H., West, L. T.D., Radcliffe, E., et al. 2007. Characteristics and genesis of preferential flow paths in a piedmont Ultisol. *Soil*  
861 *Science Society of America Journal*, 71, 752-758.
- 862 Free, G.R., Browning, G.M., Musgrave, G.W. 1940. Relative infiltration and related physical characteristics of certain soils (Vol. 729). US  
863 Dept. of Agriculture.
- 864 Fricke, W. 2015. The significance of water co-transport for sustaining transpirational water flow in plants: a quantitative approach. *Journal*  
865 *of Experimental Botany*, 66(3), 731-739.
- 866 Fujimoto, M., Ohte, N., Tani, M. 2008. Effects of hillslope topography on hydrological responses in a weathered granite mountain, Japan:  
867 Comparison of the runoff response between the valley-head and the side slope. *Hydrological Processes*, 22(14), 2581-2594.





- 868 Gaines, J.M. 2016. Flooding: Water potential. *Nature*, 531(7594), S54-S55.
- 869 Gan, R., Luo, Y., Zuo, Q., et al. 2015. Effects of projected climate change on the glacier and runoff generation in the Naryn River Basin,  
870 Central Asia. *Journal of Hydrology*, 523, 240-251.
- 871 Gao, Z.K., Yang, Y.X., Fang, P.C., et al. 2015. Multi-frequency complex network from time series for uncovering oil-water flow structure.  
872 *Scientific Reports*, 5, 8222. doi:10.1038/srep08222.
- 873 Garrido, F., Serrano, S., Barrios, L., et al. 2014. Preferential flow and metal distribution in a contaminated alluvial soil from São Domingos  
874 mine (Portugal). *Geoderma*, 213, 103-114.
- 875 Gedney, N., Cox, P.M., Betts, R.A., et al. 2006. Detection of a direct carbon dioxide effect in continental river runoff records. *Nature*,  
876 439(7078), 835-838.
- 877 Ghafoor, A., Koestel, J., Larsbo, M., et al. 2013. Soil properties and susceptibility to preferential solute transport in tilled topsoil at the  
878 catchment scale. *Journal of Hydrology*, 492, 190-199.
- 879 Gleeson, T., Befus K.M., Jasechko, S., et al. 2016. The global volume and distribution of modern groundwater. *Nature Geoscience*, 9(2),  
880 161-167.
- 881 Gober, P., Wheeler, H.S. 2014. Socio-hydrology and the science-policy interface: a case study of the Saskatchewan River basin.  
882 *Hydrology and Earth System Sciences*, 18(4), 1413-1422.
- 883 Godsey, S.E., Aas, W., Clair, T.A., et al. 2010. Generality of fractal 1/f scaling in catchment tracer time series, and its implications for  
884 catchment travel time distributions. *Hydrological Processes*, 24(12), 1660-1671.
- 885 Gordon, L.J., Steffen, W., Jönsson, B.F., et al., 2005. Human modification of global water vapor flows from the land surface. *Proceedings*  
886 *of the National Academy of Sciences of the United States of America*, 102(21), 7612-7617.
- 887 Goswami, P., Nishad, S.N. 2015. Virtual water trade and time scales for loss of water sustainability: A comparative regional analysis.  
888 *Scientific Reports*, 5. doi:10.1038/srep09306.
- 889 Graham, D.N., Butts, M.B. 2005. Flexible, integrated watershed modelling with MIKE SHE. *Watershed Models*, 849336090, 245-272.



- 890 Granged, A.J., Jordán, A., Zavala, L.M., et al. 2011. Fire-induced changes in soil water repellency increased fingered flow and runoff rates  
891 following the 2004 Huelva wildfire. *Hydrological Processes*, 25, 1614-1629.
- 892 Guebert, M.D., Gardner, T.W. 2001. Macropore flow on a reclaimed surface mine: infiltration and hillslope hydrology. *Geomorphology*,  
893 39(3), 151-169.
- 894 Guo, L., Chen, J., Lin, H. 2014. Subsurface lateral preferential flow network revealed by time-lapse ground-penetrating radar in a hillslope.  
895 *Water Resources Research*, 50(12), 9127-9147.
- 896 Haddeland, I., Heinke, J., Biemans, H., et al. 2014. Global water resources affected by human interventions and climate change.  
897 *Proceedings of the National Academy of Sciences*, 111(9), 3251-3256.
- 898 Hagedorn, F., Bruderhofer, N., Ferrari, A., et al. 2015. Tracking litter-derived dissolved organic matter along a soil chronosequence using  
899 <sup>14</sup>C imaging: Biodegradation, physico-chemical retention or preferential flow?. *Soil Biology and Biochemistry*, 88, 333-343.
- 900 Hagedorn, F., Bundt, M. 2002. The age of preferential flow paths. *Geoderma*, 108, 119-132.
- 901 Hardie, M., Lisson, S., Doyle, R., et al. 2013. Determining the frequency, depth and velocity of preferential flow by high frequency soil  
902 moisture monitoring. *Journal of Contaminant Hydrology*, 144(1), 66-77.
- 903 Hayashi, S., Murakami, S., Xu, K.Q., et al. 2015. Simulation of the reduction of runoff and sediment load resulting from the Green for  
904 Green Program in the Jialingjiang catchment, upper region of the Yangtze River, China. *Journal of Environmental Management*, 149,  
905 126-137.
- 906 Helling C.S., Gish, T.J. 1991. Physical and chemical processes affecting preferential flow, in preferential flow, in *Proceedings of a National  
907 Symposium*, Ed. By T. J. Gish and A. Shirmohammadi (American Society of Agricultural Engineers, St. Joseph, MI, 1991), pp. 77-86.
- 908 Hencher, S.R. 2010. Preferential flow paths through soil and rock and their association with landslides. *Hydrological Processes*, 24(12),  
909 1610-1630.
- 910 Hirashima, H., Yamaguchi, S., Katsushima, T. 2014. A multi-dimensional water transport model to reproduce preferential flow in the  
911 snowpack. *Cold Regions Science and Technology*, 108, 80-90.



- 912 Hoekstra, A.Y. 2003. Virtual water: An introduction. In *Virtual water trade: Proceedings of the international expert meeting on virtual*  
913 *water trade. Value of water research report series* (11) (pp. 13-23).
- 914 Hoekstra, A.Y. 2013. *The water footprint of modern consumer society*. Routledge.
- 915 Hoekstra, A.Y., Hung, P.Q. 2005. Globalisation of water resources: international virtual water flows in relation to crop trade. *Global*  
916 *Environmental Change*, 15(1), 45-56.
- 917 Hoekstra, A.Y., Mekonnen, M.M. 2011. Global water scarcity: The monthly blue water footprint compared to blue water availability for  
918 the world's major river basins.
- 919 Hoekstra, A.Y., Mekonnen, M.M. 2012. The water footprint of humanity. *Proceedings of the National Academy of Sciences*, 109(9),  
920 3232-3237.
- 921 Hopkins, I., Gall, H., Lin, H. 2016. Natural and anthropogenic controls on the frequency of preferential flow occurrence in a wastewater  
922 spray irrigation field. *Agricultural Water Management*, 178, 248-257.
- 923 Hua, G.F., Zhao, Z.W., Kong, J., et al. 2014. Effects of plant roots on the hydraulic performance during the clogging process in mesocosm  
924 vertical flow constructed wetlands. *Environmental Science and Pollution Research*, 21(22), 13017-13026.
- 925 Hueso-González, P., Ruiz-Sinoga, J.D., Martínez-Murillo, J.F., et al. 2015. Overland flow generation mechanisms affected by topsoil  
926 treatment: Application to soil conservation. *Geomorphology*, 228, 796-804.
- 927 Jafari, R., Bakhshandehmehr, L. 2016. Quantitative Mapping and Assessment of Environmentally Sensitive Areas to Desertification in  
928 Central Iran. *Land Degradation & Development*, 27 (2), 108-119.
- 929 Jarvis, N. 2007. A review of non-equilibrium water flow and solute transport in soil macropores: principles, controlling factors and  
930 consequences for water quality. *European Journal of Soil Science*, 58, 523-546.
- 931 Jarvis, N., Koestel, J., Larsbo, M. 2016. Understanding Preferential Flow in the Vadose Zone: Recent Advances and Future Prospects.  
932 *Vadose Zone Journal*, 15(12). doi:10.2136/vzj2016.09.0075.
- 933 Jiang, C., Xiong, L., Wang, D., et al. 2015. Separating the impacts of climate change and human activities on runoff using the Budyko-type



- 934 equations with time-varying parameters. *Journal of Hydrology*, 522, 326-338.
- 935 Jiang, X.J., Liu, S., Zhang, H. 2017. Effects of different management practices on vertical soil water flow patterns in the Loess Plateau.  
936 *Soil & Tillage Research*, 166, 33-42.
- 937 Johansson, E.L., Fader, M., Seaquist, J.W., et al. 2016. Green and blue water demand from large-scale land acquisitions in Africa.  
938 *Proceedings of the National Academy of Sciences*, 113(41), 11471-11476.
- 939 Jørgensen, P.R., Hoffmann, M., Kistrup, J.P., et al., 2002. Preferential flow and pesticide transport in a clay-rich till: field, laboratory, and  
940 modeling analysis. *Water Resources Research*, 38, 1246-1261.
- 941 Kalbus, E., Reinstorf, F., Schirmer, M. 2006. Measuring methods for groundwater? surface water interactions: a review. *Hydrology and  
942 Earth System Sciences Discussions*, 10(6), 873-887.
- 943 Kamolpornwijit, W., Liang, L., West, O.R., et al. 2003. Preferential flow path development and its influence on long-term PRB  
944 performance: column study. *Journal of Contaminant Hydrology*, 66(3), 161-178.
- 945 Kapetas, L., Dror, I., Berkowitz, B. 2014. Evidence of preferential path formation and path memory effect during successive infiltration  
946 and drainage cycles in uniform sand columns. *Journal of Contaminant Hydrology*, 165, 1-10.
- 947 Katuwal, S., Moldrup, P., Lamandé, M., et al. 2015. Effects of CT number derived matrix density on preferential flow and transport in a  
948 macroporous agricultural soil. *Vadose Zone Journal*, 14(7). doi:10.2136/vzj2015.01.0002.
- 949 Keesstra, S.D. 2007. Impact of natural reforestation on floodplain sedimentation in the Dragonja basin, SW Slovenia. *Earth Surface  
950 Processes and Landforms*, 32(1), 49-65.
- 951 Khan, M.R., Koneshloo, M., Knappett, P.S., et al. 2016. Megacity pumping and preferential flow threaten groundwater quality. *Nature  
952 Communications*, 7. doi:10.1038/ncomms12833.
- 953 Kidron, G.J. 2015. The role of crust thickness in runoff generation from microbiotic crusts. *Hydrological Processes*, 29(7), 1783-1792.
- 954 Kim, K.H., Kabir, E., Jahan, S.A. 2017. Exposure to pesticides and the associated human health effects. *Science of the Total Environment*,  
955 575, 525-535.



- 956 Klaus, J., Zehe, E. 2010. Modelling rapid flow response of a tile-drained field site using a 2D physically based model: assessment of  
957 'equifinal' model setups. *Hydrological Processes*, 24(12), 1595-1609.
- 958 Klaus, J., Zehe, E., Elsner, M., et al. 2013. Macropore flow of old water revisited: experimental insights from a tile-drained hillslope.  
959 *Hydrology and Earth System Sciences*, 17(1), 103-118.
- 960 Klepikova, M.V., Le Borgne, T., Bour, O., et al. 2014. Passive temperature tomography experiments to characterize transmissivity and  
961 connectivity of preferential flow paths in fractured media. *Journal of Hydrology*, 512, 549-562.
- 962 Koestel, J.K., Norgaard, T., Luong, N.M., et al. 2013. Links between soil properties and steady-state solute transport through cultivated  
963 topsoil at the field scale. *Water Resources Research*, 49(2), 790-807.
- 964 Köhne, J.M., Mohanty, B.P., Šimůnek, J. 2006. Inverse dual-permeability modeling of preferential water flow in a soil column and  
965 implications for field-scale solute transport. *Vadose Zone Journal*, 5(1), 59-76.
- 966 Kollet, S.J., Maxwell, R.M. 2006. Integrated surface-groundwater flow modeling: A free-surface overland flow boundary condition in a  
967 parallel groundwater flow model. *Advances in Water Resources*, 29(7), 945-958.
- 968 Konar, M., Hussein, Z., Hanasaki, N., et al. 2013. Virtual water trade flows and savings under climate change. *Hydrology and Earth  
969 System Sciences*, 17(8), 3219-3234.
- 970 Konar, M., Reimer, J.J., Hussein, Z., et al. 2016. The water footprint of staple crop trade under climate and policy scenarios.  
971 *Environmental Research Letters*, 11(3), 035006.
- 972 Kumar, V., Jain, S.K. 2007. Status of virtual water trade from India. *Current Science*, 93(8), 1093-1099.
- 973 Laine-Kaulio, H., Backnäs, S., Karvonen, T., et al. 2014. Lateral subsurface stormflow and solute transport in a forested hillslope: A  
974 combined measurement and modeling approach. *Water Resources Research*, 50(10), 8159-8178.
- 975 Lal, M., Mishra, S.K., Pandey, A. 2015. Physical verification of the effect of land features and antecedent moisture on runoff curve number.  
976 *Catena*, 133, 318-327.
- 977 Lathuillière, M.J., Coe, M.T., Johnson, M.S. 2016. A review of green-and blue-water resources and their trade-offs for future agricultural



- 978 production in the Amazon Basin: what could irrigated agriculture mean for Amazonia?. *Hydrology and Earth System Sciences*, 20(6),  
979 2179-2194.
- 980 Lawes, J.B., Gilbert, J.H., Warington, R. 1882. *On the Amount and Composition of the Rain and Drainage Water Collected at Rothamsted*.  
981 London: Williams, Clowes and Sons Ltd. p 167.
- 982 Leaney, F.W., Smettem, K. R.J., Chittleborough, D.J. 1993. Estimating the contribution of preferential flow to subsurface runoff from a  
983 hillslope using deuterium and chloride. *Journal of Hydrology*, 147(1-4), 83-103.
- 984 Lee, M.H., Bae, D.H. 2015. Climate change impact assessment on green and blue water over Asian monsoon region. *Water Resources*  
985 *Management*, 29(7), 2407-2427.
- 986 Levy, M.C., Garcia, M., Blair, P., et al. 2016. Wicked but worth it: student perspectives on socio-hydrology. *Hydrological Processes*, 30(9),  
987 1467-1472.
- 988 Li, J., Li, F., Liu, Q., et al., 2014. Trace metal in surface water and groundwater and its transfer in a Yellow River alluvial fan: Evidence  
989 from isotopes and hydrochemistry. *Science of the Total Environment*, 472, 979-988.
- 990 Li, Y.M., Ghodrati, M., 1994. Preferential transport of nitrate through soil columns containing root channels. *Soil Science Society of*  
991 *America Journal*, 58 (3), 653-659.
- 992 Lin, H. 2010. Linking principles of soil formation and flow regimes. *Journal of Hydrology*, 393 (1-2), 3-19.
- 993 Liu, B.Y., Nearing, M.A., Shi, P.J., et al. 2000. Slope length effects on soil loss for steep slopes. *Soil Science Society of America Journal*,  
994 64(5), 1759-1763.
- 995 Liu, C.W., Cheng, S.W., Yu, W.S., et al. 2003. Water infiltration rate in cracked paddy soil. *Geoderma*, 117(1), 169-181.
- 996 Liu, H., Lin, H. 2015. Frequency and control of subsurface preferential flow: From pedon to catchment scales. *Soil Science Society of*  
997 *America Journal*, 79(2), 362-377.
- 998 Lovarelli, D., Bacenetti, J., Fiala, M. 2016. Water Footprint of crop productions: A review. *Science of the Total Environment*, 548,  
999 236-251.



- 1000 Luo, L., Lin, H., Li, S. 2010. Quantification of 3-D soil macropore networks in different soil types and land uses using computed  
1001 tomography. *Journal of Hydrology*, 393, 53-64.
- 1002 Lutz, A.F., Immerzeel, W.W., Shrestha, A.B., et al. 2014. Consistent increase in High Asia's runoff due to increasing glacier melt and  
1003 precipitation. *Nature Climate Change*, 4(7), 587-592.
- 1004 Ma, J., Hoekstra, A.Y., Wang, H., et al. 2006. Virtual versus real water transfers within China. *Philosophical Transactions of the Royal  
1005 Society of London B: Biological Sciences*, 361(1469), 835-842.
- 1006 Maestre, F.T., Delgado-Baquerizo, M., Jeffries, T.C., et al. 2015. Increasing aridity reduces soil microbial diversity and abundance in  
1007 global drylands. *Proceedings of the National Academy of Sciences*, 112(51), 15684-15689.
- 1008 Malet, J.P., Laigle, D., Remaitre, A., et al. 2005. Triggering conditions and mobility of debris flows associated to complex earthflows.  
1009 *Geomorphology*, 66(1), 215-235.
- 1010 Markstrom, S.L., Niswonger, R.G., Regan, R.S., et al. 2008. *GSFLOW-Coupled Ground-water and Surface-water FLOW model based on  
1011 the integration of the Precipitation-Runoff Modeling System (PRMS) and the Modular Ground-Water Flow Model (MODFLOW-2005)*  
1012 (No. 6-D1). Geological Survey (US).
- 1013 Martin, J.B., Dean, R.W. 2001. Exchange of water between conduits and matrix in the Floridan aquifer. *Chemical Geology*, 179(1),  
1014 145-165.
- 1015 McColl, K.A., Alemohammad, S.H., Akbar, R., et al. 2017. The global distribution and dynamics of surface soil moisture. *Nature  
1016 Geoscience*, 10(2), 100-104.
- 1017 Menichino, G.T., Ward, A.S., Hester, E.T. 2014. Macropores as preferential flow paths in meander bends. *Hydrological Processes*, 28(3),  
1018 482-495.
- 1019 Michaelides, K., Wainwright, J. 2002. Modelling the effects of hillslope-channel coupling on catchment hydrological response. *Earth  
1020 Surface Processes and Landforms*, 27(13), 1441-1457.
- 1021 Michalak, A.M. 2016. Study role of climate change in extreme threats to water quality. *Nature*, 535(7612), 349.



- 1022 Mohanty, S.K., Saiers, J.E., Ryan, J.N. 2016. Colloid mobilization in a fractured soil: effect of pore-water exchange between preferential  
1023 flow paths and soil matrix. *Environmental Science & Technology*, 50(5), 2310-2317.
- 1024 Mooney, S.J., Morris, C. 2008. A morphological approach to understanding preferential flow using image analysis with dye tracers and  
1025 X-ray computed tomography. *Catena*, 73(2), 204-211.
- 1026 Morales, V.L., Parlange, J.Y., Steenhuis, T.S. 2010. Are preferential flow paths perpetuated by microbial activity in the soil matrix? A  
1027 review. *Journal of Hydrology*, 393(1), 29-36.
- 1028 Morris, C., Mooney, S.J. 2004. A high-resolution system for the quantification of preferential flow in undisturbed soil using observations  
1029 of tracers. *Geoderma*, 118(1), 133-143.
- 1030 Mossadeghi-Björklund, M., Arvidsson, J., Keller, T., et al. 2016. Effects of subsoil compaction on hydraulic properties and preferential  
1031 flow in a Swedish clay soil. *Soil & Tillage Research*, 156, 91-98.
- 1032 Mubako, S.T., Lant, C.L. 2013. Agricultural virtual water trade and water footprint of US states. *Annals of the Association of American  
1033 Geographers*, 103(2), 385-396.
- 1034 Najafi, M.R., Moradkhani, H. 2015. Multi-model ensemble analysis of runoff extremes for climate change impact assessments. *Journal of  
1035 Hydrology*, 525, 352-361.
- 1036 Neuman, S.P. 2005. Trends, prospects and challenges in quantifying flow and transport through fractured rocks. *Hydrogeology Journal*,  
1037 13(1), 124-147.
- 1038 Nieber, J.L., Sidle, R.C. 2010. How do disconnected macropores in sloping soils facilitate preferential flow?. *Hydrological Processes*,  
1039 24(12), 1582-1594.
- 1040 Nielsen, D.R., Van Genuchten M.T., Biggar, J.W. 1986. Water flow and solute transport processes in the unsaturated zone. *Water  
1041 Resources Research*, 22(9S), 89S-108S.
- 1042 Nimmo J.R. 2012. Preferential flow occurs in unsaturated conditions. *Hydrological Processes*, 26, 786-789.
- 1043 Nimmo, J.R. 2016. Quantitative framework for preferential flow initiation and partitioning. *Vadose Zone Journal*, 15(2).





- 1044 doi:10.2136/vzj2015.05.0079.
- 1045 Noguchi, S., Tsuboyama, Y., Sidle, R.C., et al. 1999. Morphological characteristics of macropores and the distribution of preferential flow  
1046 pathways in a forested slope segment. *Soil Science Society of America Journal*, 63(5), 1413-1423.
- 1047 Nourani, V., Fard, A. F., Niazi, F., et al. 2015. Implication of remotely sensed data to incorporate land cover effect into a linear  
1048 reservoir-based rainfall-runoff model. *Journal of Hydrology*, 529, 94-105.
- 1049 Öhrström, P., Persson M., Albergel, J., et al. 2002. Field-scale variation of preferential flow as indicated from dye coverage. *Journal of*  
1050 *Hydrology*, 257, 164-173.
- 1051 Pahar, G., Dhar, A. 2014. A dry zone-wet zone based modeling of surface water and groundwater interaction for generalized ground profile.  
1052 *Journal of Hydrology*, 519, 2215-2223.
- 1053 Panday, S., Huyakorn, P.S. 2004. A fully coupled physically-based spatially-distributed model for evaluating surface/subsurface flow.  
1054 *Advances in Water Resources*, 27(4), 361-382.
- 1055 Pandey, S., Rajaram. H. 2016. Modeling the influence of preferential flow on the spatial variability and time-dependence of mineral  
1056 weathering rates, *Water Resources Research*, 52, 9344-9366.
- 1057 Pekel, J.F., Cottam, A., Gorelick, N., et al. 2016. High-resolution mapping of global surface water and its long-term changes. *Nature*, 540,  
1058 418-422.
- 1059 Peñuela, A., Darboux, F., Javaux, M., et al. 2016. Evolution of overland flow connectivity in bare agricultural plots. *Earth Surface*  
1060 *Processes and Landforms*, 41, 1595-1613.
- 1061 Petersen, C.T., Jensen, H.E., Hansen, S., et al. 2001. Susceptibility of a sandy loam soil to preferential flow as affected by tillage. *Soil &*  
1062 *Tillage Research*, 58, 81-89.
- 1063 Peterson, E.W., Wicks, C.M. 2005. Fluid and solute transport from a conduit to the matrix in a carbonate aquifer system. *Mathematical*  
1064 *geology*, 37(8), 851-867.
- 1065 Phalkey, R.K., Aranda-Jan, C., Marx, S., et al. 2015. Systematic review of current efforts to quantify the impacts of climate change on



- 1066        undernutrition. Proceedings of the National Academy of Sciences, 112(33), E4522-E4529.
- 1067        Prudhomme, C., Giuntoli, I., Robinson, E.L., et al. 2014. Hydrological droughts in the 21st century, hotspots and uncertainties from a  
1068        global multimodel ensemble experiment. Proceedings of the National Academy of Sciences, 111(9), 3262-3267.
- 1069        Rassam, D.W. 2011. A conceptual framework for incorporating surface-groundwater interactions into a river operation-planning model.  
1070        Environmental Modelling & Software, 26(12), 1554-1567.
- 1071        Rassam, D.W., Peeters, L., Pickett, T., et al. 2013. Accounting for surface-groundwater interactions and their uncertainty in river and  
1072        groundwater models: A case study in the Namoi River, Australia. Environmental Modelling & Software, 50, 108-119.
- 1073        Rockström, J., Gordon, L., Folke, C., et al., 1999. Linkages among water vapor flows, food production, and terrestrial ecosystem services.  
1074        Conservation Ecology 3(2): 5.
- 1075        Rodriguez-Lloveras, X., Buytaert, W., Benito, G. 2016a. Land use can offset climate change induced increases in erosion in Mediterranean  
1076        watersheds. Catena, 143, 244-255.
- 1077        Rodriguez-Lloveras, X., Corella, J.P., Benito, G. 2016b. Modelling the hydro-sedimentary dynamics of a Mediterranean semiarid  
1078        ungauged watershed beyond the instrumental period. Land Degradation & Development. doi: 10.1002/ldr.2678.
- 1079        Rye, C.F., Smettem, K.R.J. 2017. The effect of water repellent soil surface layers on preferential flow and bare soil evaporation. Geoderma,  
1080        289, 142-149.
- 1081        Sadeghi, S.H.R., Moghadam, E.S., Darvishan, A.K. 2016. Effects of subsequent rainfall events on runoff and soil erosion components  
1082        from small plots treated by vinasse. Catena, 138, 1-12.
- 1083        Sakakibara, K., Tsujimura, M., Song, X., et al., 2017. Spatiotemporal variation of the surface water effect on the groundwater recharge in a  
1084        low-precipitation region: Application of the multi-tracer approach to the Taihang Mountains, North China. Journal of Hydrology, 545,  
1085        132-144.
- 1086        Salo, H., Warsta, L., Turunen, M., et al. 2017. Simulating 3-D water flow in subsurface drain trenches and surrounding soils in a clayey  
1087        field. Soil & Tillage Research, 168, 20-32.



- 1088 Sammartino, S., Lissy, A.S., Bogner, C., et al. 2015. Identifying the functional macropore network related to preferential flow in structured  
1089 soils. *Vadose Zone Journal*, 14(10). doi:10.2136/vzj2015.05.0070.
- 1090 Sammartino, S., Michel, E., Capowiez, Y. 2012. A novel method to visualize and characterize preferential flow in undisturbed soil cores by  
1091 using multislice helical CT. *Vadose Zone Journal*, 11 (1). doi 10.2136/vzj2011.0100.
- 1092 Sanders, E.C., Abou Najm, M.R., Mohtar, R.H., et al. 2012. Field method for separating the contribution of surface-connected preferential  
1093 flow pathways from flow through the soil matrix. *Water Resources Research*, 48, 4534-4542.
- 1094 Saravanathiiban, D.S., Kutay, M.E., Khire, M.V. 2014. Effect of macropore tortuosity and morphology on preferential flow through  
1095 saturated soil: A Lattice Boltzmann study. *Computers and Geotechnics*, 59, 44-53.
- 1096 Savenije, H.H., Van der Zaag, P. 2000. Conceptual framework for the management of shared river basins; with special reference to the  
1097 SADC and EU. *Water Policy*, 2(1), 9-45.
- 1098 Schewe, J., Heinke, J., Gerten, D., et al. 2014. Multimodel assessment of water scarcity under climate change. *Proceedings of the National  
1099 Academy of Sciences*, 111(9), 3245-3250.
- 1100 Schumacher, W. 1864. *Die Physik des Bodens*. Berlin: Wiegandt and Hempel.
- 1101 Schwarz, J., Mathijs, E., Maertens, M. 2015. Changing patterns of global agri-food trade and the economic efficiency of virtual water  
1102 flows. *Sustainability*, 7(5), 5542-5563.
- 1103 Scibek, J., Allen, D.M., Cannon, A.J., et al., 2007. Groundwater-surface water interaction under scenarios of climate change using a  
1104 high-resolution transient groundwater model. *Journal of Hydrology*, 333(2), 165-181.
- 1105 Sebben, M.L., Werner, A.D. 2016. A modelling investigation of solute transport in permeable porous media containing a discrete  
1106 preferential flow feature. *Advances in Water Resources*, 94, 307-317.
- 1107 Shao, W., Bogaard, T.A., Bakker, M., et al. 2015. Quantification of the influence of preferential flow on slope stability using a numerical  
1108 modelling approach. *Hydrology and Earth System Sciences*, 19(5), 2197-2212.
- 1109 Sivapalan, M., Konar, M., Srinivasan, V., et al. 2014. Socio-hydrology: Use-inspired water sustainability science for the Anthropocene.



- 1110 Earth's Future, 2(4), 225-230.
- 1111 Sivapalan, M., Savenije, H.H., Blöschl, G. 2012. Socio - hydrology: A new science of people and water. Hydrological Processes, 26(8),  
1112 1270-1276.
- 1113 Snehota, M., Jelinkova, V., Sacha, J., et al. 2015. Experimental investigation of preferential flow in a near-saturated intact soil sample.  
1114 Physics Procedia, 69, 496-502.
- 1115 Sohr, J., Ries, F., Sauter, M., et al. 2014. Significance of preferential flow at the rock soil interface in a semi-arid karst environment.  
1116 Catena, 123, 1-10.
- 1117 Sophocleous, M. 2002. Interactions between groundwater and surface water: the state of the science. Hydrogeology journal, 10(1), 52-67.
- 1118 Sophocleous, M. 2010. Review: groundwater management practices, challenges, and innovations in the High Plains aquifer, USA—lessons  
1119 and recommended actions. Hydrogeology Journal, 18(3), 559-575.
- 1120 Sophocleous, M.A., Koelliker, J.K., Govindaraju, R.S., et al. 1999. Integrated numerical modeling for basin-wide water management: The  
1121 case of the Rattlesnake Creek basin in south-central Kansas. Journal of Hydrology, 214(1), 179-196.
- 1122 Stamm, C.H., Flüßler, H., Gächter, R., et al. 1998. Preferential transport of phosphorus in drained grassland soils. Journal of  
1123 Environmental Quality, 27(3), 515-522.
- 1124 Stanhill, G., Cohen, S. 2001. Global dimming: a review of the evidence for a widespread and significant reduction in global radiation with  
1125 discussion of its probable causes and possible agricultural consequences. Agricultural and Forest Meteorology, 107(4), 255-278.
- 1126 Stoof, C.R., Slingerland, E.C., Mol, W., et al. 2014. Preferential flow as a potential mechanism for fire-induced increase in streamflow.  
1127 Water Resources Research, 50(2), 1840-1845.
- 1128 Stumpp, C., Maloszewski, P. 2010. Quantification of preferential flow and flow heterogeneities in an unsaturated soil planted with  
1129 different crops using the environmental isotope  $\delta^{18}\text{O}$ . Journal of Hydrology, 394(3), 407-415.
- 1130 Sun, S., Wang, Y., Engel, B.A., et al. 2016. Effects of virtual water flow on regional water resources stress: A case study of grain in China.  
1131 Science of the Total Environment, 550, 871-879.

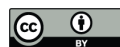

- 1132 Sun, S.K., Wu, P.T., Wang, Y.B., et al. 2013. The virtual water content of major grain crops and virtual water flows between regions in  
1133 China. *Journal of the Science of Food and Agriculture*, 93(6), 1427-1437.
- 1134 Tamea, S., Allamano, P., Carr, J.A., et al. 2013. Local and global perspectives on the virtual water trade. *Hydrology and Earth System  
1135 Sciences*, 17(3), 1205-1215.
- 1136 Taylor, R.G., Scanlon, B., Döll, P., et al., 2013. Ground water and climate change. *Nature Climate Change*, 3(4), 322-329.
- 1137 Tesemma, Z.K., Wei, Y., Peel, M.C., et al. 2015. The effect of year-to-year variability of leaf area index on Variable Infiltration Capacity  
1138 model performance and simulation of runoff. *Advances in Water Resources*, 83, 310-322.
- 1139 Tesemma, Z.K., Wei, Y., Peel, M.C., et al., 2015. The effect of year-to-year variability of leaf area index on variable infiltration capacity  
1140 model performance and simulation of runoff. *Advances in Water Resources*, 83(9), 310–322.
- 1141 Therrien, R., McLaren, R.G., Sudicky, E.A., et al. 2010. HydroGeoSphere: A three-dimensional numerical model describing  
1142 fully-integrated subsurface and surface flow and solute transport. *Groundwater Simulations Group, University of Waterloo, Waterloo,  
1143 ON*.
- 1144 Troy T.J., Konar M., Srinivasan V., et al. 2015. Moving Socio-hydrology Forward: A Synthesis across Studies. *Hydrology and Earth  
1145 System Sciences*, 19(8), 3667-3679.
- 1146 Uhlenbrook, S. 2006. Catchment hydrology—a science in which all processes are preferential. *Hydrological Processes*, 20(16), 3581-3585.
- 1147 Van Der Heijden, G., Legout, A., Pollier, B., et al. 2013. Tracing and modeling preferential flow in a forest soil—Potential impact on  
1148 nutrient leaching. *Geoderma*, 195, 12-22.
- 1149 Van Oel, P.R., Hoekstra, A.Y. 2012. Towards quantification of the water footprint of paper: a first estimate of its consumptive component.  
1150 *Water Resources Management*, 26(3), 733-749.
- 1151 van Oudenhoven, A.P., Veerkamp, C.J., Alkemade, R., et al. 2015. Effects of different management regimes on soil erosion and surface  
1152 runoff in semi-arid to sub-humid rangelands. *Journal of Arid Environments*, 121, 100-111.
- 1153 van Schaik, L., Palm, J., Klaus, J., et al. 2014. Linking spatial earthworm distribution to macropore numbers and hydrological



- 1154 effectiveness. *Ecohydrology*, 7(2), 401-408.
- 1155 van Schaik, N.L.M.B., Schnabel, S., Jetten, V.G. 2008. The influence of preferential flow on hillslope hydrology in a semi-arid watershed  
1156 (in the Spanish Dehesas). *Hydrological Processes*, 22, 3844-3855.
- 1157 Vanham, D. 2016. Does the water footprint concept provide relevant information to address the water-food-energy-ecosystem nexus?.  
1158 *Ecosystem Services*, 17, 298-307.
- 1159 Veetil, A.V., Mishra, A.K. 2016. Water security assessment using blue and green water footprint concepts. *Journal of Hydrology*, 542,  
1160 589-602.
- 1161 Vieira, D.C.S., Fernández, C., Vega, J.A., et al. 2015. Does soil burn severity affect the post-fire runoff and interrill erosion response?. A  
1162 review based on meta-analysis of field rainfall simulation data. *Journal of Hydrology*, 523, 452-464.
- 1163 Viglione, A., Di Baldassarre, G., Brandimarte, L., et al. 2014. Insights from socio-hydrology modelling on dealing with flood risk—roles of  
1164 collective memory, risk-taking attitude and trust. *Journal of Hydrology*, 518, 71-82.
- 1165 Vogel, T., Sanda, M., Dusek, J., et al. 2010. Using oxygen-18 to study the role of preferential flow in the formation of hillslope runoff.  
1166 *Vadose Zone Journal*, 9(2), 252-259.
- 1167 Von Blanckenburg, F., Bouchez, J., Ibarra, D.E., et al. 2015. Stable runoff and weathering fluxes into the oceans over Quaternary climate  
1168 cycles. *Nature Geoscience*, 8(7), 538-542.
- 1169 Wang, F., Hessel, R., Mu, X., et al. 2015. Distinguishing the impacts of human activities and climate variability on runoff and sediment  
1170 load change based on paired periods with similar weather conditions: A case in the Yan River, China. *Journal of Hydrology*, 527,  
1171 884-893.
- 1172 Wang, Y.B., Wu, P.T., Zhao, X.N., et al. 2014. Virtual water flows of grain within China and its impact on water resource and grain  
1173 security in 2010. *Ecological Engineering*, 69, 255-264.
- 1174 Weiler, M. 2017. Macropores and preferential flow—a love-hate relationship. *Hydrological Processes*, 31(1), 15-19.
- 1175 Weiskel, P.K., Wolock, D.M., Zarriello, P.J., et al. 2014. Hydroclimatic regimes: a distributed water-balance framework for hydrologic



- 1176 assessment, classification, and management. *Hydrology and Earth System Sciences*, 18(10), 3855-3872.
- 1177 Wiekenkamp, I., Huisman, J.A., Bogena, H.R., et al. 2016. Spatial and temporal occurrence of preferential flow in a forested headwater  
1178 catchment. *Journal of Hydrology*, 534, 139-149.
- 1179 Williams, M.R., King, K.W., Ford, W., et al. 2016. Effect of tillage on macropore flow and phosphorus transport to tile drains. *Water  
1180 Resources Research*, 52(4), 2868-2882.
- 1181 Wittenberg, H. 2003. Effects of season and man-made changes on baseflow and flow recession: case studies. *Hydrological Processes*,  
1182 17(11), 2113-2123.
- 1183 Xin, P., Yu, X., Lua, C., et al., 2016. Effects of macro-pores on water flow in coastal subsurface drainage systems. *Advances in Water  
1184 Resources*, 87, 56-67.
- 1185 Yang, H., Thompson, J.R., Flower, R.J. 2015. Beijing 2022: Olympics will make water scarcity worse. *Nature*, 525(7570), 455-455.
- 1186 Yousefi, G., Safadoust, A., Mahboubi, A.A., et al. 2014. Bromide and lithium transport in soils under long-term cultivation of alfalfa and  
1187 wheat. *Agriculture, Ecosystems & Environment*, 188, 221-228.
- 1188 Yuan, Z., Chu, Y., Shen, Y. 2015. Simulation of surface runoff and sediment yield under different land-use in a Taihang Mountains  
1189 watershed, North China. *Soil & Tillage Research*, 153, 7-19.
- 1190 Zehe, E., Flüßler, H. 2001. Preferential transport of isoproturon at a plot scale and a field scale tile-drained site. *Journal of Hydrology*,  
1191 247(1), 100-115.
- 1192 Zeitoun, M., Allan, J.T., Mohieldeen, Y. 2010. Virtual water 'flows' of the Nile Basin, 1998-2004: A first approximation and implications  
1193 for water security. *Global Environmental Change*, 20(2), 229-242.
- 1194 Zema, D.A., Denisi, P., Taguas Ruiz, E.V., et al. 2016. Evaluation of Surface Runoff Prediction by AnnAGNPS Model in a Large  
1195 Mediterranean Watershed Covered by Olive Groves. *Land Degradation & Development*, 27 (3), 811-822.
- 1196 Zhang, L., Wang, J., Bai, Z., et al. 2015a. Effects of vegetation on runoff and soil erosion on reclaimed land in an opencast coal-mine  
1197 dump in a loess area. *Catena*, 128, 44-53.



- 1198 Zhang, Y., Niu, J., Yu, X., et al. 2015b. Effects of fine root length density and root biomass on soil preferential flow in forest ecosystems.  
1199 Forest Systems, 24(1), 012. doi: 10.5424/fs/2015241-06048.
- 1200 Zhang, Y., Niu, J., Zhang, M., et al. 2017. Interaction Between Plant Roots and Soil Water Flow in Response to Preferential Flow Paths in  
1201 Northern China. Land Degradation & Development, 28, 648-663.
- 1202 Zhang, Y., Niu, J., Zhu, W., et al. 2015c. Effects of plant roots on soil preferential pathways and soil matrix in forest ecosystems. Journal of  
1203 Forestry Research, 26(2), 397-404.
- 1204 Zhang, Y., Zhang, M., Niu, J., et al. 2016a. The preferential flow of soil: A widespread phenomenon in pedological perspectives. Eurasian  
1205 Soil Science, 49(6), 661-672.
- 1206 Zhang, Y., Zhang, M., Niu, J., et al. 2016b. Rock fragments and soil hydrological processes: Significance and progress. Catena, 147,  
1207 153-166.
- 1208 Zhang, Z., Shi, M., Yang, H., et al. 2011. An input-output analysis of trends in virtual water trade and the impact on water resources and  
1209 uses in China. Economic Systems Research, 23(4), 431-446.
- 1210 Zhang, Z., Yang, H., Shi, M. 2016c. Spatial and sectoral characteristics of China's international and interregional virtual water flows-based  
1211 on multi-regional input-output model. Economic Systems Research, 28(3), 362-382.
- 1212 Zhang, Z.B., Peng, X., Zhou, H., et al. 2015d. Characterizing preferential flow in cracked paddy soils using computed tomography and  
1213 breakthrough curve. Soil & Tillage Research, 146, 53-65.
- 1214 Zhang, Z.B., Zhou, H., Zhao, Q.G., et al. 2014. Characteristics of cracks in two paddy soils and their impacts on preferential flow.  
1215 Geoderma, 228, 114-121.
- 1216 Zhao, G., Mu, X., Jiao, J., et al. 2017. Evidence and Causes of Spatiotemporal Changes in Runoff and Sediment Yield on the Chinese  
1217 Loess Plateau. Land Degradation & Development, 28, 579-590.
- 1218 Zhou, G., Wei, X., Chen, X., et al. 2015a. Global pattern for the effect of climate and land cover on water yield. Nature Communications, 6,  
1219 5918. doi: 10.1038/ncomms6918.





- 1220 Zhou, Y., Shi, C., Fan, X., et al. 2015b. The influence of climate change and anthropogenic activities on annual runoff of Huangfuchuan
- 1221 basin in northwest China. Theoretical and Applied Climatology, 120(1-2), 137-146.
- 1222



1223 **Figure Captions**

1224 Figure 1. A global network of published papers themed with water flow in the period 1995-2015. Dark red dots indicate papers published  
1225 by USA, and red dots by China, Canada and Japan. Dark blue dots indicate few papers published by those countries.

1226 Figure 2. The three components of water footprint including blue water flow, green water flow, and grey water flow incorporating into a  
1227 clear framework (Falkenmark and Rockström, 2006; Lathuillière et al., 2016).

1228 Figure 3. The average volume ( $\times 10^8 \text{ m}^3$ ) of water use and water resources in the period 1995-2015 in China including the North, East,  
1229 Northeast, South, Southwest and Northwest. A represented the average volume of water use of industry, domestic water use and  
1230 agricultural products in the six parts of China, and B represented the average volume of water resources of surface water, groundwater and  
1231 total water resources in the six parts of China, respectively.

1232 Figure 4. The development of preferential flow from the number of publications per year and per country in the period 1995-2015, and the  
1233 focus of preferential flow where studies were conducted in different inter-disciplines. In Fig. 4 a, a wider range of studies are relating to  
1234 water science, environmental science, and soil science; In Fig. 4 b, the number of published papers  $> 100$  each country was indicated; In  
1235 Fig. 4 c, the number of literatures on preferential flow per year was showed.

1236 Figure 5. The global framework of cooperation among countries in the world studying on preferential flow at a global scale was showed,  
1237 and the number of publications per country by author affiliations and area in which the research was conducted.

1238 Figure 6. Preferential flow integrated analysis in this composite Figure. Family branches are shown in an unrooted phylogenetic tree from  
1239 the drivers, occurrence mechanisms, types, degrees, properties, models, methods, scales of preferential flow, to the progress of preferential  
1240 flow. The composite figure summarizes the development of preferential flow across-the-board.

1241 Figure 7. A love-hate relationship between water flow and preferential flow pathways.

1242

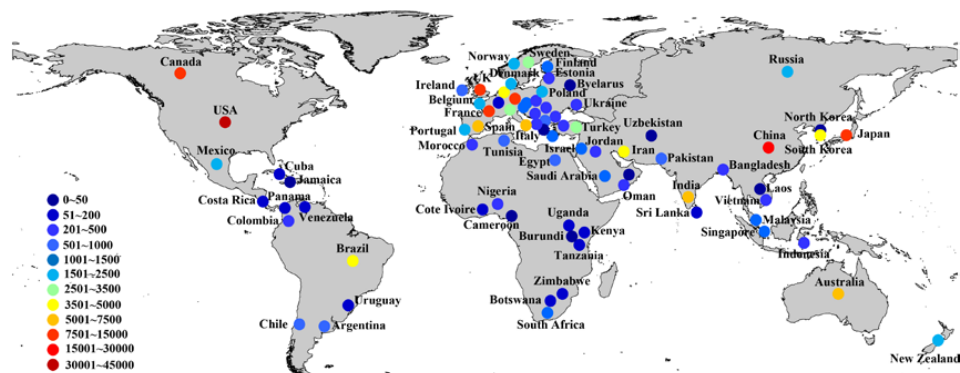

1243

1244 Figure 1. A global network of published papers themed with water flow in the period 1995-2015. Dark red dots indicate papers published

1245 by USA, and red dots by China, Canada and Japan. Dark blue dots indicate few papers published by those countries.

1246

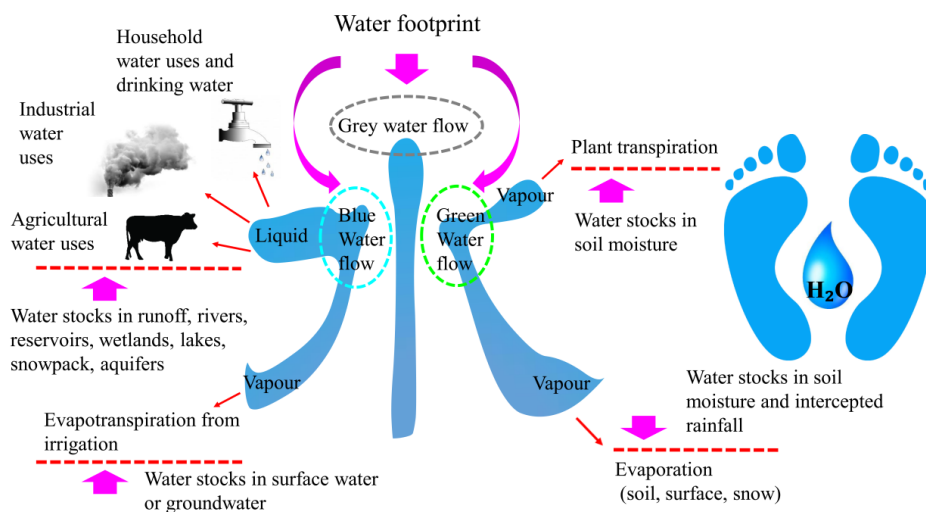

1247

1248 **Figure 2.** The three components of water footprint including blue water flow, green water flow, and grey water flow incorporating into a

1249 clear framework (Falkenmark and Rockström, 2006; Lathuillière et al., 2016).

1250

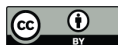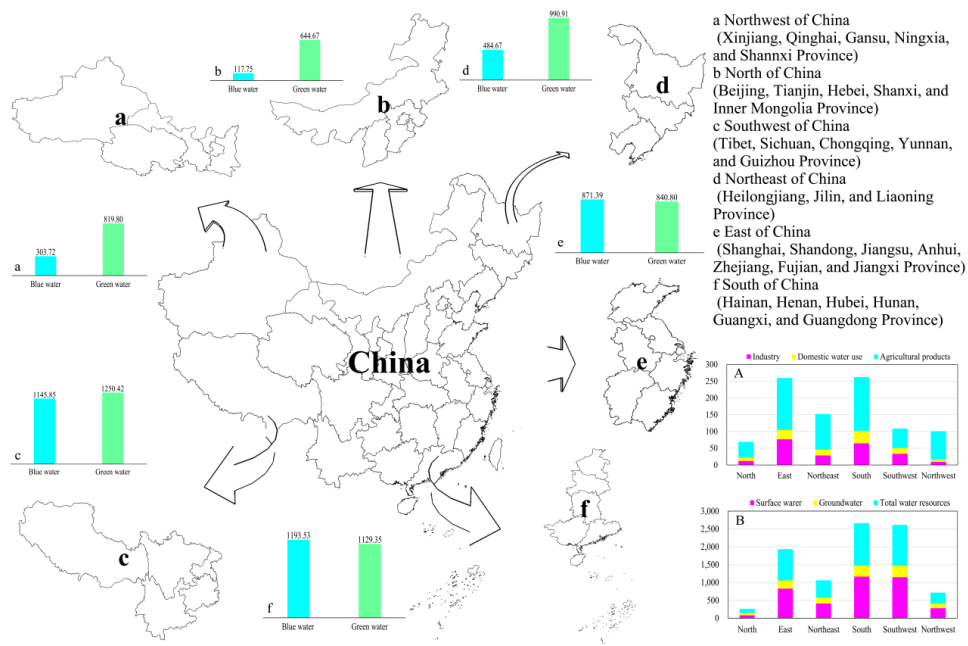

1251

1252 **Figure 3.** The average volume (× 10<sup>8</sup> m<sup>3</sup>) of water use and water resources in the period 1995-2015 in China including the North, East,  
 1253 Northeast, South, Southwest and Northwest. A represented the average volume of water use of industry, domestic water use and  
 1254 agricultural products in the six parts of China, and B represented the average volume of water resources of surface water, groundwater and  
 1255 total water resources in the six parts of China, respectively.

1256

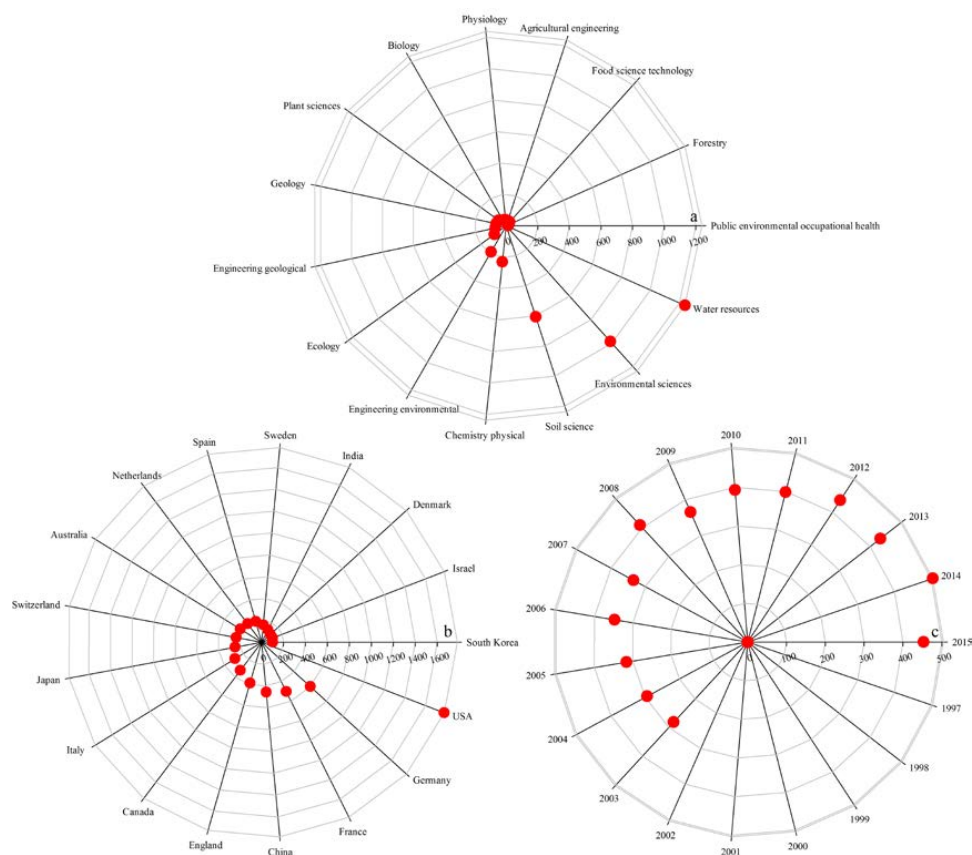

1257

1258 Figure 4. The development of preferential flow from the number of publications per year and per country in the period 1995-2015, and the  
1259 focus of preferential flow where studies were conducted in different inter-disciplines. In Fig. 4 a, a wider range of studies are relating to  
1260 water science, environmental science, and soil science; In Fig. 4 b, the number of published papers > 100 each country was indicated; In  
1261 Fig. 4 c, the number of literatures on preferential flow per year was showed.

1262

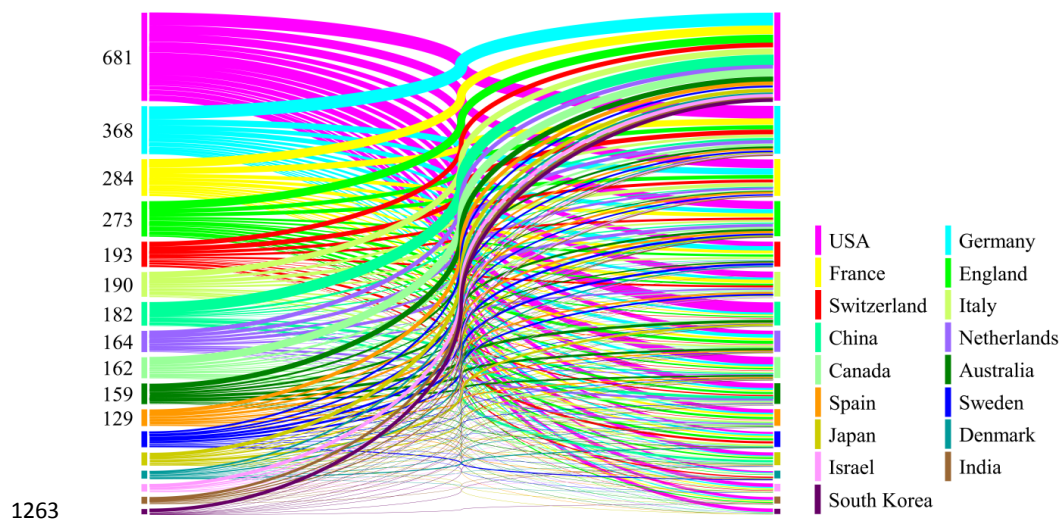

1264 Figure 5. The global **framework of cooperation** among countries in the world studying on preferential flow at a global scale was showed,

1265 and the number of publications per country by author affiliations and area in which the research was conducted.

1266

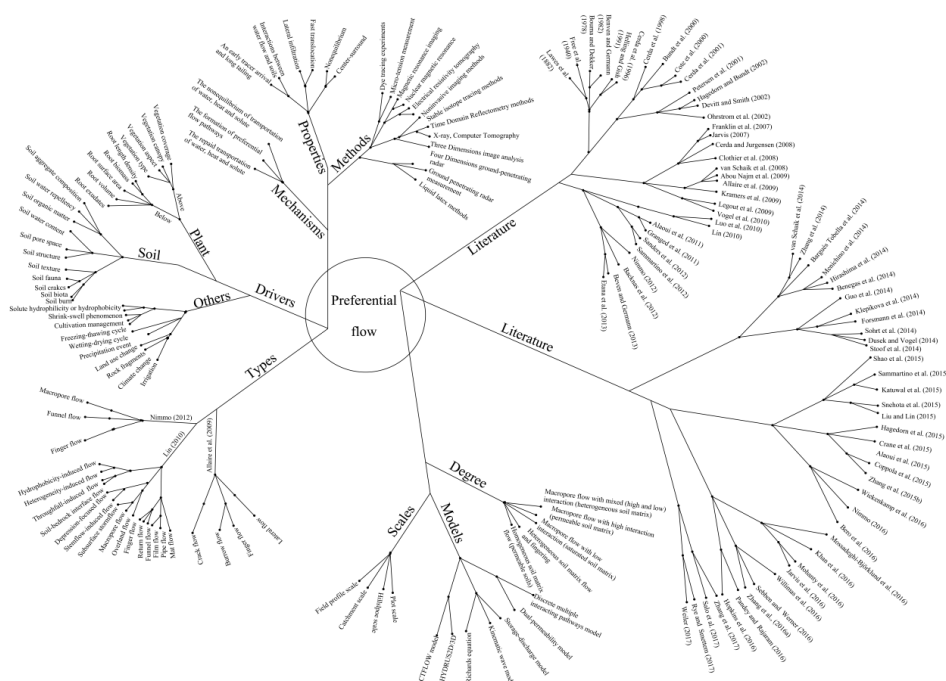

1267

1268 **Figure 6:** Preferential flow integrated analysis in this composite Figure. Family branches are shown in an unrooted phylogenetic tree from

1269 the drivers, occurrence mechanisms, types, degrees, properties, models, methods, scales of preferential flow, to the progress of preferential

1270 flow. The composite figure summarizes the development of preferential flow across-the-board.

1271



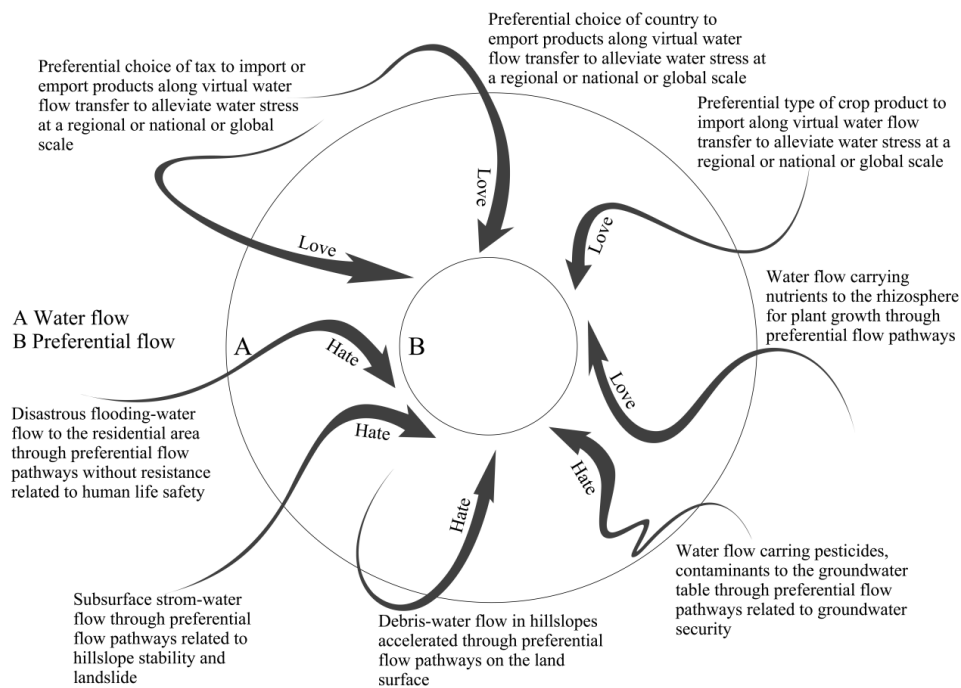

1272

1273 **Figure 7.** A love-hate relationship between water flow and preferential flow pathways.

1274



1275 **Table Captions**

1276 Table 1. Studies on the progress of virtual water flow in global or regional or national perspectives.

1277

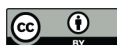

1278 Table 1. **Studies on the progress of virtual water flow in global or regional or national perspectives**

| Literature               | Objective                                                                         | Key findings                                                                                                                                                                                      |
|--------------------------|-----------------------------------------------------------------------------------|---------------------------------------------------------------------------------------------------------------------------------------------------------------------------------------------------|
| Hoekstra and Hung (2005) | Virtual water flow between nations                                                | Virtual water flow between nations at about 1000 km <sup>3</sup> a <sup>-1</sup> at the turn of 20th century, and agricultural products accounting for almost 70%                                 |
| Ma et al. (2006)         | Virtual water flow between north and south in China                               | More virtual water flow from north to south in China than the maximum real water transfer volume along the Water Transfer Project from south to north                                             |
| Chapagain et al. (2006)  | Global virtual water flow                                                         | Importing products alleviating water at a global scale if virtual water flow from sites rich in to sites poor in water resources                                                                  |
| Kumar and Jain (2007)    | Virtual water flow in India                                                       | India is a net importer of virtual water                                                                                                                                                          |
| Dabrowski et al. (2009)  | Virtual water flow of maize in the Southern African Development Community region  | Virtual water flow of agricultural products at different spatial scales benefits water allocation, water use efficiency and alleviation of water scarcity                                         |
| Zeitoun et al. (2010)    | Virtual water flow of crop and livestock products in Nile Basin states, 1998-2004 | Virtual water flow benefits devising policy of national water security                                                                                                                            |
| Zhang et al. (2011)      | Virtual water flow of individual sectors in China                                 | China is a net virtual water exporter, and water scarce regions have higher percentages of virtual water exports                                                                                  |
| Feng et al. (2012)       | Virtual water flow in the Yellow River Basin, China                               | The Yellow River Basin, China is a net virtual water exporter, and the most water scarce region in the basin should increase the import of irrigated crops and processed food products            |
| Antonelli et al. (2012)  | Alternative estimation of virtual water flow                                      | More accurate estimates of virtual water flow in global trade combining input-output techniques from qualitative points of view                                                                   |
| Mubako et al. (2013)     | Virtual water flow in US states of California and Illinois                        | California and Illinois are net virtual water exporter in 2008, and virtual water flow pattern and volume cannot be explained in terms of water endowments alone                                  |
| Tamea et al. (2013)      | Virtual water flow in Italy from local and global perspectives, 1986-2010         | Italy import and export of virtual water have grown markedly. In Italy, the dependence on import has increased over the last decades and has overcome the internal production since the year 2000 |
| Konar et al. (2013)      | Global virtual water flow under climate change                                    | The total volume of virtual water flow is likely to decrease under climate change                                                                                                                 |
| Sun et al. (2013)        | Virtual water flow of crops between regions in China                              | Grain diversion from northern regions to southern regions is disproportionate to the distribution of water resources in China                                                                     |
| Dong et al. (2014)       | Inter-provincial virtual water flow in China                                      | Developed areas, such as Shanghai, Beijing, import virtual water to alleviate their water scarcity, and agricultural sector is the main part of virtual water flow among provinces in China       |
| Dalin et al. (2014)      | Virtual water flow of food from                                                   | Water savings from foreign imports actually are even greater                                                                                                                                      |



|                           |                                                                                 |                                                                                                                                                                                                                              |
|---------------------------|---------------------------------------------------------------------------------|------------------------------------------------------------------------------------------------------------------------------------------------------------------------------------------------------------------------------|
|                           | interprovincial and global perspectives in China                                | than the global water savings in China, and 93% of these foreign virtual water imports are associated with soy-based commodities                                                                                             |
| Dang et al. (2015)        | Agricultural virtual water flow in US                                           | The volume of virtual water flow in US is equivalent to 51% of global virtual water flow, and the network of virtual water flow in US is more social, homogeneous, and equitable than the global virtual water trade network |
| Goswami and Nishad (2015) | Temporal scales virtual water flow in India and China                           | Virtual water flow can affect overall water sustainability and the net virtual water export alone can lead to loss of water sustainability of a nation in time scales but cannot be considered too long for a nation         |
| Schwarz et al. (2015)     | Virtual water flow of global agricultural food trade in the period of 1986-2011 | In Africa and Southern America, virtual water flow has roughly quadrupled since 1986. In all regions, staples and industrial products account for the largest share in virtual water trade                                   |
| Fracasso et al. (2016)    | Virtual water flow of agricultural goods in the Mediterranean basin             | Larger water endowments do not necessarily lead to a larger export of virtual water and higher water irrigation prices reduce (increase) virtual water exports (imports).                                                    |
| Zhang et al. (2016c)      | Global virtual water flow of agricultural products in China                     | The trend that China exported virtual water per year was on the decline while the imported was on a rising trend                                                                                                             |
| Flach et al. (2016)       | Virtual water flow from Brazilian municipalities to countries of consumption    | Policy relevance of current assessments of virtual water flow at the national level may be hampered                                                                                                                          |
| Sun et al. (2016)         | Virtual water flow of grain between regions in China                            | Virtual water flow changes the original water distribution and has a significant effect on water resources in both virtual water import and export regions                                                                   |
